# Supplementary material
Source: MDPI journal article supplement (https://www.mdpi.com/2311-7524/10/3/291)
Supplement: s1 [file s1 › Supplementary Tables.xlsx]

## Sheet: Table S1
Table S1. List of the 573 identified metabolites and their relative content in the four different colored bitter melon pericarps.
Index	Q1 (Da)	Q3 (Da)	Rt (min)	Molecular Weight (Da)	Ionization model	KEGG ID	Compounds	Class	Average relative content
									1392	262	K1102	K115	Mix
pma2987	142.1	83.1	0.62	141.1	[M+H]+	C00860	Histidinol	Alcohols	550667	618000	481667	510000	569667
pme0499	181	71	0.76	182.08	[M-H]-	C00794	D-Sorbitol	Alcohols	107667	162333	157667	131667	147000
pme0513	151	59	0.77	152.07	[M-H]-	C00379	Xylitol	Alcohols	457667	611667	522000	542000	516667
pme0516	179.2	87	0.74	180.06	[M-H]-	C00137	Inositol	Alcohols	3520000	4.85333e+06	2.71333e+06	4680000	3920000
pme1944	183.1	69	0.8	182.08	[M+H]+	C00392	D-Mannitol	Alcohols	39000	26303	30603	15006	36800
pme2237	181.1	101	0.76	182.08	[M-H]-	C01697	Dulcitol	Alcohols	143000	255667	254000	207333	220667
pme2256	151.1	71	0.77	152.07	[M-H]-	C01904	D-Arabitol	Alcohols	620333	979333	853000	862667	811333
pmf0173	173.2	173.2	6.017	174.28	[M-H]-	-	"1,2-Decanediol"	Alcohols	826667	1.87333e+06	768000	1.08667e+06	1.12667e+06
pmf0174	157.2	157.2	7.72	158.28	[M-H]-	C01633	1-Decanol	Alcohols	10540000	4.20333e+06	11100000	8790000	6980000
pmf0175	157.2	157.2	7.84	158.28	[M-H]-	-	2-Decanol	Alcohols	10270000	4.05667e+06	1.15667e+07	8.85667e+06	7350000
pmf0256	101.1	84.7	1.28	102.1	[M-H]-	-	3-Methyl-1-pentanol	Alcohols	869667	637000	1.23333e+06	673667	897333
pmf0348	187.1	97	4.43	188.14	[M-H]-	-	"2,6-Dimethyl-7-octene-2,3,6-triol"	Alcohols	1.71333e+06	1.74667e+06	1510000	909667	1.51333e+06
pmf0388	221.1	206	4.38	222.13	[M-H]-	-	Dehydrovomifoliol	Alcohols	47233.3	35500	42566.7	66200	45800
pma1840	250	147	2.73	250	Protonated	-	Coumaroyl choline	Alkaloids	448333	293633	670333	66269.7	426667
pma2405	280	177	2.87	280	Protonated	-	Feruloylcholine	Alkaloids	7.56333e+06	5.29333e+06	6790000	5.48333e+06	6.39667e+06
pma6270	258.2	104.2	0.78	258.2	Protonated	C00670	sn-Glycero-3-phosphocholine	Alkaloids	1.20667e+06	2460000	684000	1.98667e+06	1.72333e+06
pmb0037	166.1	121.3	1.53	165.1	[M+H]+	C06199	Hordenine	Alkaloids	2120000	800000	1.37333e+06	2050000	1610000
pmb0426	219.1	174.4	3.84	218.1	[M+H]+	C08309	"5-Methoxy-N,N-dimethyltryptamine"	Alkaloids	1590000	888333	1.58333e+06	2.46333e+06	1.63667e+06
pmb0769	485.1	323.1	3.79	484.1	[M+H]+	-	N-hexosyl-p-coumaroyl serotonin	Alkaloids	809333	434333	1.36333e+06	841333	823333
pmb0776	337.1	177.4	2.79	336.1	[M+H]+	-	N-Feruloyl tryptamine	Alkaloids	894667	193233	292333	248333	809333
pmb1754	184	125	0.78	183	[M+H]+	C00588	O-Phosphocholine	Alkaloids	1260000	770003	1.56333e+06	1.03733e+06	1.25667e+06
pmb2211	343.1	240.7	6.59	342.1	[M+H]+	-	Cocamidopropyl betaine	Alkaloids	8.36667e+06	3890000	5130000	8040000	6.72333e+06
pme1416	159.2	129	2.74	160.1	[M-H]-	C00398	L-Tryptamine	Alkaloids	33769.7	68300	90066.7	9	65266.7
pme1453	233	159	4.16	232.12	[M+H]+	C01598	Melatonin	Alkaloids	267000	9	9	937667	369667
pme1738	138.1	95	0.8	137.07	[M+H]+	C02918	3-Carbamyl-1-methylpyridinium (1-Methylnicotinamide)	Alkaloids	1.77333e+06	5.55667e+06	1500000	2.38667e+06	1.85667e+06
pme2108	163	104	0.68	162.11	[M+H]+	C00318	L-Carnitine	Alkaloids	52100	322333	44700	87133.3	54266.7
pme2155	181	138	2.23	180	[M+H]+	C07480	Theobromine	Alkaloids	496667	94669.7	45339.3	211000	234667
pme2268	138	94	0.79	137.05	[M+H]+	C01004	Trigonelline	Alkaloids	102067	124567	190667	99500	140567
pme2596	184.1	148	1.67	183.05	[M+H]+	C00847	4-Pyridoxic acid	Alkaloids	2.42333e+06	2091000	2.42667e+06	2.01333e+06	2.51333e+06
pme2786	219	160	3.32	218.11	[M+H]+	C00978	N-Acetyl-5-hydroxytryptamine	Alkaloids	1.57667e+06	1092000	1950000	1.29333e+06	1.84667e+06
pme3333	153.1	136.1	1.51	152.06	[M+H]+	-	"1,4-dihydro-1-Methyl-4-oxo-3-pyridinecarboxamide"	Alkaloids	330333	231000	245667	238667	250333
pmf0209	306.2	137	7.49	305.2	[M+H]+	C06866	Capsaicin	Alkaloids	20569.7	4672.67	59800	24966.7	32700
pmf0213	195.1	83	3.14	194.08	[M+H]+	C07481	Caffeine	Alkaloids	1.32767e+07	179367	1.18603e+06	1159000	4.04667e+06
pmf0214	181.1	124.1	2.64	180.06	[M+H]+	C07130	Theophylline	Alkaloids	1380000	699667	681000	1.42667e+06	1.07667e+06
pmf0231	349.9	198	10.08	348.93	[M+H]+	C14322	Chlorpyrifos	Alkaloids	56166.7	79866.7	63000	143333	108167
pmf0267	160	115.9	4.37	161.05	[M-H]-	C19837	Indole-3-carboxylic	Alkaloids	246000	155667	149000	182000	191333
pmf0323	177.1	118	1.98	176.1	[M+H]+	-	(-)-Cotinine	Alkaloids	573000	159000	349000	179667	326333
pmf0327	241.1	198	4.46	242.08	[M-H]-	C01727	lumichrome	Alkaloids	300333	281333	293333	142667	262667
pmf0336	160	116	4.39	161.05	[M-H]-	C19837	Indole-3-carboxylic acid	Alkaloids	238333	166667	149333	189333	193000
pmf0373	187.1	132	6.77	186.08	[M+H]+	-	Caulilexin C	Alkaloids	246333	217333	194000	274667	248333
pmf0384	163.1	130	1.25	162.12	[M+H]+	C00745	Nicotine	Alkaloids	639000	433000	539000	723333	1140000
pmf0403	290.2	124	3.28	289.17	[M+H]+	C02046	L-Hyoscyamine	Alkaloids	501667	946667	885333	308667	833333
pmf0455	432.3	415	3.4	431.34	[M+H]+	C10830	Peimine	Alkaloids	6110000	4.84333e+06	1.21667e+07	4.75667e+06	8.95667e+06
pmf0531	205.1	101	1.18	204.13	[M+H]+	C10760	N-Methylcytisine	Alkaloids	461333	124003	284000	186000	305667
pmf0557	327	171	6.09	350.03	[M]-	C19371	Acid orange 20	Alkaloids	2.28667e+06	1.93333e+06	1.39333e+06	191000	1460000
pmf0559	217.1	116	2.64	218.11	[M-H]-	C02983	Abrine	Alkaloids	94500	74600	50033.3	9	52466.7
pmf0565	175	112.9	0.79	176.04	[M-H]-	-	L-Dencichin	Alkaloids	3.94667e+06	16400000	1.68333e+07	1.16333e+07	1.11333e+07
pmb2561	190.1	84	2.37	191.1	[M-H]-	C02712	N-Acetylmethionine	Amino acid and derivatives	166667	300667	127633	110333	111333
pmb2591	245	203.2	3.87	246	[M-H]-	C03137	Acetyl tryptophan	Amino acid and derivatives	1.06767e+06	929000	936333	316333	843333
pmb2673	210.1	135.1	1.5	211.1	[M-H]-	-	"3-(6-Hydroxy-3,4-dioxo-1,5-cyclohexadien-1-yl)-L-alanine"	Amino acid and derivatives	464667	249667	313667	446333	339333
pmb2855	307	145	0.77	308	[M-H]-	-	L-Glutamine O-hexside	Amino acid and derivatives	360333	174667	722000	237333	450333
pmb2873	214.1	134	3.65	215.1	[M-H]-	-	3-(2-Naphthyl)-D-alanine	Amino acid and derivatives	3000000	2520000	2.50667e+06	2.94667e+06	2600000
pmb3264	611.1	306.2	1.17	612.1	[M-H]-	C00127	Glutathione oxidized	Amino acid and derivatives	2100000	2.54333e+06	1.98333e+06	3.75333e+06	5.25333e+06
pme0003	188.1	145	0.81	189.11	[M-H]-	C02427	L-Homocitrulline	Amino acid and derivatives	217667	154667	209333	166667	205333
pme0007	174.1	131.1	0.79	175.1	[M-H]-	C00327	L-Citrulline	Amino acid and derivatives	2570000	3.16333e+06	3.17333e+06	2.60667e+06	3.19667e+06
pme0009	104	73.7	0.79	105.04	[M-H]-	C00065	L-Serine	Amino acid and derivatives	798667	183667	1.36667e+06	135333	643333
pme0011	132	88	0.8	133.04	[M-H]-	C00049	L-Aspartic acid	Amino acid and derivatives	1840000	1.05367e+06	1.50667e+06	1.39333e+06	1520000
pme0013	146.1	102	0.75	147.05	[M-H]-	C00025	L-Glutamic acid	Amino acid and derivatives	3870000	1.85667e+06	3200000	2.73333e+06	3300000
pme0015	239	62	0.78	240.02	[M-H]-	C00491	L-(-)-Cystine	Amino acid and derivatives	274667	341667	402667	290667	406333
pme0018	130.1	84	1.27	131.09	[M-H]-	C00123	L-Leucine	Amino acid and derivatives	940000	743667	1.77667e+06	739000	1.02833e+06
pme0020	164.1	103	1.92	165.08	[M-H]-	C00079	L-Phenylalanine	Amino acid and derivatives	2.99667e+06	2.85333e+06	4320000	2.39333e+06	3.12333e+06
pme0022	118	73.9	0.76	119.06	[M-H]-	C00188	L-Threonine	Amino acid and derivatives	1.00467e+07	4160000	7710000	5670000	7.29667e+06
pme0025	209.1	146	1.92	208.08	[M+H]+	C00328	L-Kynurenine	Amino acid and derivatives	16400000	9430000	1.59333e+07	1.26333e+07	14300000
pme0036	154.1	137	0.72	155.07	[M-H]-	C00135	L-Histidine	Amino acid and derivatives	7440000	4.92667e+06	8.51667e+06	2.40667e+06	4920000
pme0039	118.1	72.1	0.85	117.08	[M+H]+	C00183	L-Valine	Amino acid and derivatives	210667	257000	283000	176000	227000
pme0042	173.1	131.1	0.73	174.11	[M-H]-	C00062	L-(+)-Arginine	Amino acid and derivatives	34100000	6.82667e+07	1.50667e+07	3.08667e+07	3.09667e+07
pme0050	203	116	2.39	204.09	[M-H]-	C00078	L-Tryptophan	Amino acid and derivatives	2260000	2.39333e+06	4.36333e+06	1.52667e+06	2.82333e+06
pme0056	145.1	101	2.57	146.06	[M-H]-	-	"2,3-dimethylsuccinic acid"	Amino acid and derivatives	1.12333e+06	1260000	979667	1025000	1.08333e+06
pme0057	136	118.1	0.87	135.04	[M+H]+	C00155	DL-Homocysteine	Amino acid and derivatives	44833.3	42700	69400	27766.7	48233.3
pme0075	188.1	128	1.18	189.06	[M-H]-	C00624	N-Acetyl-L-glutamic acid	Amino acid and derivatives	1050000	524667	377000	373333	642667
pme0122	189.2	126	1.14	188.12	[M+H]+	C02727	N6-Acetyl-L-lysine	Amino acid and derivatives	808667	547667	2920000	590000	1320000
pme0123	171.2	114	0.85	172.08	[M-H]-	-	Glycyl-L-proline	Amino acid and derivatives	22666.7	11610	20100	14233.3	16233.3
pme0128	159.2	88	0.75	160.08	[M-H]-	C00993	D-Alanyl-D-Alanine	Amino acid and derivatives	49600	34700	57200	43733.3	51266.7
pme0133	281.3	166	2.37	280.11	[M+H]+	-	Asp-phe	Amino acid and derivatives	1.98333e+06	1.54733e+06	1660000	1.84667e+06	1.78333e+06
pme0138	189.2	84	1.11	188.08	[M+H]+	-	Nα-Acetyl-L-glutamine	Amino acid and derivatives	2.09333e+07	1.20433e+07	2.58333e+07	8550000	18100000
pme0161	118.1	72	0.75	119.06	[M-H]-	C00263	L-Homoserine	Amino acid and derivatives	136333	65800	147333	83233.3	107667
pme0164	263.1	204	3.9	264.11	[M-H]-	C05642	N-γ-Acetyl-N-2-Formyl-5-methoxykynurenamine	Amino acid and derivatives	1.98333e+06	1620000	1020000	412667	1.28333e+06
pme0171	158.1	74	2.84	159.09	[M-H]-	-	N-Isovaleroylglycine	Amino acid and derivatives	16866.7	2022.67	9090	16233.3	10306.7
pme0176	263.1	145	3.17	264.11	[M-H]-	C04148	Phenylacetyl-L-glutamine	Amino acid and derivatives	25400	5506	15536.3	23333.3	28033.3
pme0181	170.1	124	0.72	169.09	[M+H]+	C01152	1-Methylhistidine	Amino acid and derivatives	33600000	2.84667e+07	3.73333e+07	4.50333e+07	3.83333e+07
pme0191	189.1	86	1.91	188.12	[M+H]+	C02155	N-Glycyl-L-leucine	Amino acid and derivatives	3570000	2.27133e+06	2.36333e+06	2.02333e+06	2.79667e+06
pme0226	131.1	114	0.78	132.05	[M-H]-	C00152	L-Asparagine	Amino acid and derivatives	977000	616333	2.28333e+06	1.04333e+06	1.29667e+06
pme0252	172.1	130	3.51	173.11	[M-H]-	C02710	N-Acetyl-l-leucine	Amino acid and derivatives	3.15333e+06	3710000	3.33333e+06	2.14333e+06	3340000
pme0279	189.1	171	0.79	190.1	[M-H]-	C00666	"2,6-Diaminooimelic acid"	Amino acid and derivatives	1.36333e+06	1039000	847000	925000	1.25667e+06
pme0463	175	84	1.16	174.1	[M+H]+	C01047	L-Theanine	Amino acid and derivatives	7.25333e+06	5.54667e+06	1.29667e+07	7.22667e+06	9.42667e+06
pme1070	180.1	119.3	1.16	181.07	[M-H]-	C00082	L-(-)-Tyrosine	Amino acid and derivatives	12300000	1.03067e+07	3.21333e+07	7790000	1.60333e+07
pme1086	306	143	1.17	307.08	[M-H]-	C00051	Glutathione reduced form	Amino acid and derivatives	21100000	9.36333e+06	1.19667e+07	4.44667e+06	2670000
pme1104	130.1	82	1.26	131.1	[M-H]-	C00407	L-Isoleucine	Amino acid and derivatives	926000	732000	1.72333e+06	721000	1.08333e+06
pme1210	150	61	1.15	149.05	[M+H]+	C00073	L-Methionine	Amino acid and derivatives	43900	26800	56500	24600	33333.3
pme1225	219.1	144	1.66	220.09	[M-H]-	C00643	5-Hydroxy-L-tryptophan	Amino acid and derivatives	57133.3	40700	53233.3	47666.7	53500
pme1239	320.4	143	1.27	321.1	[M-H]-	C11347	S-(methyl)glutathione	Amino acid and derivatives	79900	59266.7	56500	44166.7	63133.3
pme1283	383	134	1.36	384.12	[M-H]-	C00021	S-(5'-Adenosy)-L-homocysteine	Amino acid and derivatives	107900	89666.7	55500	113567	110000
pme1313	237.1	192	1.98	236.08	[M+H]+	C02700	N'-Formylkynurenine	Amino acid and derivatives	3.65333e+06	1116000	4.25667e+06	875667	2.60667e+06
pme1322	215.1	173	1.14	216.12	[M-H]-	-	Nα-Acetyl-L-arginine	Amino acid and derivatives	42666.7	80600	31666.7	59566.7	46366.7
pme1368	128	82	1.16	129.08	[M-H]-	C00408	L-Pipecolic acid	Amino acid and derivatives	70800	10939.3	131000	77933.3	132000
pme1408	145.1	109	0.76	146.07	[M-H]-	C00064	L-Glutamine	Amino acid and derivatives	5.83333e+06	1.91333e+06	2.72667e+07	1.06333e+07	12500000
pme1419	164	104	1.77	163	[M+H]+	-	L-Methionine methyl ester	Amino acid and derivatives	99766.7	45169.7	84833.3	67233.3	84166.7
pme1676	245.1	88	4.07	246.1	[M-H]-	-	N-(3-Indolylacetyl)-L-alanine	Amino acid and derivatives	81666.7	95466.7	130100	9	88366.7
pme1712	275	257	0.79	276.13	[M-H]-	C00449	L-Saccharopine	Amino acid and derivatives	392000	329000	1.09333e+06	326333	480000
pme1872	114.1	86	0.81	115.06	[M-H]-	C00148	L-Proline	Amino acid and derivatives	253667	231333	182333	166667	237000
pme2122	112.1	95	0.84	111.08	[M+H]+	C00388	Histamine	Amino acid and derivatives	1.16667e+06	1120000	1.22333e+06	1170000	1400000
pme2427	222.1	180	2.61	223.09	[M-H]-	-	N-Acetyl-L-tyrosine	Amino acid and derivatives	215000	161003	270667	9	246333
pme2614	164	100	0.76	165.05	[M-H]-	-	Methionine sulfoxide	Amino acid and derivatives	26466.7	12100	41666.7	13000	36533.3
pme2698	313.4	166	3.62	312.15	[M+H]+	-	Phe-Phe	Amino acid and derivatives	179667	118900	131000	99566.7	145000
pme2890	269	136	0.85	268.06	[M+H]+	C01817	L-Homocystine	Amino acid and derivatives	108467	79466.7	86733.3	81466.7	99333.3
pme2914	161	99	1.59	162.05	[M-H]-	C03761	"3-Hydroxy-3-methylpentane-1,5-dioic acid"	Amino acid and derivatives	1.32333e+06	1.08333e+06	735000	432000	1.07333e+06
pme3179	179	76	0.86	178.04	[M+H]+	C01419	CYS-GLY	Amino acid and derivatives	366333	290333	252333	137000	30900
pme3351	144.1	126	0.84	145.07	[M-H]-	C04076	Allysine(6-Oxo DL-Norleucine)	Amino acid and derivatives	200000	412667	469333	923333	1.16667e+06
pme3382	160	98	1.16	161.07	[M-H]-	-	N-Acetylthreonine	Amino acid and derivatives	124667	67233.3	91166.7	94166.7	104067
pme3387	187	145	0.84	188.13	[M-H]-	C01924	H-HomoArg-OH	Amino acid and derivatives	2.42667e+06	514667	1530000	494333	1210000
pme3825	196.2	135	1.16	197.07	[M-H]-	C00355	"3,4-Dihydroxy-DL-phenylalanine"	Amino acid and derivatives	260000	198000	694667	164000	322667
pmf0441	206.1	147.1	3.84	207.09	[M-H]-	C03519	N-Acetyl-L-phenylalanine	Amino acid and derivatives	1.78667e+06	1600000	1800000	768000	1.52667e+06
pmf0484	132.1	86	1.35	131.09	[M+H]+	C01933	alpha-Aminocaproic acid	Amino acid and derivatives	2.02334e+06	2.29333e+06	3740000	2870000	3.49667e+06
pmf0587	132	88	0.78	133.04	[M-H]-	C16433	Aspartic acid	Amino acid and derivatives	1800000	983333	1.33667e+06	1360000	1.40333e+06
pmf0589	146	102	0.76	147.05	[M-H]-	-	Glutamic acid	Amino acid and derivatives	3.94333e+06	1.85333e+06	3.22667e+06	2690000	3.27333e+06
pmf0594	166.2	77	1.92	165.19	[M+H]+	C02265	D-(+)-Phenylalanine	Amino acid and derivatives	2.62333e+07	1.92633e+07	3.35333e+07	2.24333e+07	25800000
pmb0545	477.1	315	3.32	477.1	Protonated	-	Rosinidin O-hexoside	Anthocyanins	578333	823000	713333	1.30667e+06	785000
pme0444	493.2	331	2.92	493.2	Protonated	C12140	Malvidin 3-O-glucoside (Oenin)	Anthocyanins	331667	187003	363333	2210000	768333
pme1397	271	149	3.85	271.24	Protonated	C05904	Pelargonidin	Anthocyanins	710667	601000	539333	883000	674000
pme3391	479	317	2.56	479	Protonated	C12139	Petunidin 3-O-glucoside	Anthocyanins	6170000	3.58667e+06	2.98333e+06	9830000	4.44333e+06
pme3392	433.1	271	2.83	433.1	Protonated	-	Pelargonidin 3-O-beta-D-glucoside（Callistephin chloride)	Anthocyanins	670667	1225000	1.93667e+06	739667	1.40333e+06
pme3609	287	213	3.54	287.24	Protonated	C05905	Cyanidin	Anthocyanins	381667	184967	354667	71766.7	263000
pmf0618	893.23	449.4	2.78	893.23	Protonated	-	Cyanidin 3-p-hydroxybenzoylsophoroside-5-glucoside	Anthocyanins	22033.3	358533	207000	450333	279333
pma6455	229	97	0.86	230.02	[M-H]-	C00117	Ribulose-5-phosphate	Carbohydrates	224333	225000	194333	239333	149000
pmb0786	180	162	0.69	179	[M+H]+	C00329	Glucosamine	Carbohydrates	307233	1.92667e+06	492000	460333	304000
pmb2653	649.1	145	0.76	650.1	[M-H]-	-	D(+)-Melezitose O-rhamnoside	Carbohydrates	51800	1582.67	43133.3	6069.67	44433.3
pmb3088	421.1	241.1	0.71	422.1	[M-H]-	C00689	Trehalose 6-phosphate	Carbohydrates	75700	187667	60133.3	129233	62833.3
pme0500	503.4	323	0.81	504.17	[M-H]-	-	D(+)-Melezitose	Carbohydrates	55166.7	13700	17233.3	13600	20800
pme0519	341	119	0.8	342.12	[M-H]-	-	D-(+)-Sucrose	Carbohydrates	4540000	9.23667e+06	2.47333e+06	1.10333e+07	6920000
pme1021	177.1	99	0.86	178.05	[M-H]-	C00198	"D-(+)-Glucono-1,5-lactone"	Carbohydrates	1.06733e+07	10800000	7.09333e+06	7760000	8170000
pme1846	179	71	0.77	180.06	[M-H]-	C00031	D(+)-Glucose	Carbohydrates	2.39333e+06	2.21667e+06	2.15333e+06	2.34667e+06	2310000
pme2019	149	59	0.81	150.05	[M-H]-	-	DL-Arabinose	Carbohydrates	1160000	870333	964667	803667	1.18333e+06
pme2755	222	144	0.62	221.09	[M+H]+	C00140	N-Acetyl-D-glucosamine	Carbohydrates	4.03667e+06	1.11667e+07	3.31333e+06	5950000	5270000
pme3160	259	97	0.71	260.03	[M-H]-	C00092	D-Glucose 6-phosphate	Carbohydrates	979667	820667	617333	1112000	581667
pme3313	259	97	0.83	260.03	[M-H]-	C00085	D-Fructose 6-phosphate	Carbohydrates	1.32333e+07	11100000	7780000	1.47667e+07	7.72667e+06
pmf0032	341.1	179	0.75	342.12	[M-H]-	-	Galactinol	Carbohydrates	7.53333e+06	1.64333e+07	4.08667e+06	1.88333e+07	1.17333e+07
pmf0035	259	97	0.78	260.03	[M-H]-	-	Glucose-1-phosphate	Carbohydrates	949333	803000	621000	1.00467e+06	585667
pmf0138	179	59	0.87	180.063	[M-H]-	C00159	D-(+)-Mannose	Carbohydrates	4.09667e+06	3.39667e+06	3620000	4.06667e+06	4.11667e+06
pmf0139	179	59	0.67	180.06	[M-H]-	C00124	D-(+)-Galactose	Carbohydrates	4220000	3.27667e+06	3350000	3870000	3.88667e+06
pmf0220	259	97	0.8	303.99	[M-2Na+H]-	-	D-Fructose 6-phosphate-disodium salt	Carbohydrates	1053000	872000	648333	1.15533e+06	649000
pmf0282	341.1	113	0.73	342.12	[M-H]-	C05402	Melibiose	Carbohydrates	2.58333e+06	5190000	1.39333e+06	6.24333e+06	3780000
pmf0485	503.2	179	0.8	504.17	[M-H]-	C00713	Panose	Carbohydrates	248000	27633.3	41066.7	25400	77900
pmb2979	549.2	387.1	3.91	550.2	[M-H]-	-	Hesperetin O-malonylhexoside	Flavanone	10486.3	25103	9	83166.7	48100
pme0001	609.2	301	4.07	610.19	[M-H]-	C09806	Hesperetin 7-O-neohesperidoside (Neohesperidin)	Flavanone	3.97667e+07	34800000	46700000	2.72667e+07	37000000
pme0331	581.2	273	4.16	580.18	[M+H]+	C09789	Naringenin 7-O-neohesperidoside (Naringin)	Flavanone	197333	120367	249667	8903	167333
pme0371	433.1	271	4.22	434.12	[M-H]-	C09099	Naringenin 7-O-glucoside (Prunin)	Flavanone	425000	631667	530667	420333	537000
pme0421	275.1	169	5.56	274.08	[M+H]+	C00774	Phloretin	Flavanone	211000	129533	116667	9	113667
pme1399	355.2	178.5	8.4	354.15	[M+H]+	C16417	Xanthohumol	Flavanone	4306	86566.7	9	39100	49500
pme1598	463.1	301	3.85	464.13	[M-H]-	-	Hesperetin 5-O-glucoside	Flavanone	1.17667e+07	8.41667e+06	9830000	524333	7.85333e+06
pme2949	609.2	301	4.08	610.19	[M-H]-	C09755	Hesperetin 7-rutinoside (Hesperidin)	Flavanone	8.25333e+06	7440000	9.85667e+06	4.99667e+06	7.59333e+06
pme3282	273	229	3.4	274.08	[M-H]-	C09320	"Afzelechin (3,5,7,4'-Tetrahydroxyflavan)"	Flavanone	91566.7	99100	164000	174333	121000
pma0249	479.1	317.1	3.52	478.12	[M+H]+	-	Selgin 5-O-hexoside	Flavone	817667	178800	229667	9	406667
pma0294	463.1	301	4.04	462.12	[M+H]+	-	Chrysoeriol 5-O-hexoside	Flavone	338333	559333	174000	536333	496333
pma0760	565	317	4.33	564	[M+H]+	-	Selgin O-malonylhexoside	Flavone	20906	46769.7	85966.7	9172.67	51466.7
pma1108	433.1	283.1	3.78	432.11	[M+H]+	-	Apigenin C-glucoside	Flavone	147667	9	12139.3	22772.7	61733.3
pma3443	535.3	331.1	5.78	534.3	[M+H]+	-	Tricin 7-O-acetylglucoside	Flavone	51803	99200	66700	51936.3	81600
pma6199	417.2	255.1	4.99	416.2	[M+H]+	-	Chrysin O-hexoside	Flavone	202667	386667	333667	1.04467e+06	543000
pma6496	449.1	299.1	3.45	448.1	[M+H]+	-	Luteolin 6-C-glucoside	Flavone	653667	343667	1.13167e+06	1.22667e+06	943000
pma6499	509.3	347.1	3.41	508.3	[M+H]+	-	Limocitrin O-hexoside	Flavone	1.85333e+06	9	9	9.54333e+06	2.79333e+06
pma6647	625.2	607.1	3.37	624.2	[M+H]+	-	C-hexosyl-chrysoeriol O-hexoside	Flavone	595667	163400	69166.7	248333	213333
pma6687	557.2	331	4.44	556.2	[M+H]+	-	Tricin 4'-O-(syringyl glyceryl)ether	Flavone	176000	189333	210333	247667	253000
pmb0601	595.1	301.4	4.12	594.1	[M+H]+	-	Chrysoeriol O-hexosyl-O-pentoside	Flavone	23403	12472.7	58533.3	9	30433.3
pmb0607	463.2	301.1	4.3	462.2	[M+H]+	-	Chrysoeriol 7-O-hexoside	Flavone	272000	151767	53339.3	9	200667
pmb0618	627.1	465.1	2.78	626.1	[M+H]+	-	8-C-hexosyl-hesperetin O-hexoside	Flavone	5.94333e+06	4650000	5.24667e+06	6780000	5.87333e+06
pmb0621	641.1	622.8	3.09	640.1	[M+H]+	-	C-hexosyl-isorhamnetin O-hexoside	Flavone	457000	9	245333	9	184000
pmb0628	613.1	451.1	3.09	612.1	[M+H]+	-	Eriodictiol C-hexosyl-O-hexoside	Flavone	2150000	1.79367e+06	1700000	2.44667e+06	2.02333e+06
pmb0644	449.1	299.2	3.45	448.1	[M+H]+	-	Luteolin C-hexoside	Flavone	713333	370667	1.43667e+06	1.30667e+06	1063000
pmb0665	611.2	465.1	3.78	610.2	[M+H]+	-	Luteolin 8-C-hexosyl-O-hexoside	Flavone	426667	229000	426000	253667	429667
pmb0679	755.1	417.4	3.94	754.1	[M+H]+	-	C-rhamnosyl-apigenin O-feruloylhexoside	Flavone	81933.3	128867	57966.7	29233.3	91633.3
pmb0693	565.1	433.3	3.39	564.1	[M+H]+	-	C-hexosyl-apigenin C-pentoside	Flavone	168333	160733	243000	234667	218667
pmb0717	527.2	331	4.11	526.2	[M+H]+	-	Tricin 5-O-β-guaiacylglycerol	Flavone	319333	231333	205667	212333	262667
pmb0736	493.1	331	4.3	492.1	[M+H]+	-	Tricin 7-O-hexoside	Flavone	360667	75033.3	310667	389000	369333
pmb2954	771.1	609.3	2.83	772.1	[M-H]-	-	Luteolin O-hexosyl-O-hexosyl-O-hexoside	Flavone	20066.7	19300	11669.7	16200	19266.7
pmb2968	623.1	239.1	2.48	624.1	[M-H]-	-	Chrysoeriol C-hexosyl-O-hexoside	Flavone	26333.3	16933.3	13996.7	15333.3	16600
pmb2984	491.1	287.1	5.09	492.1	[M-H]-	-	Acetyl-eriodictyol O-hexoside	Flavone	2.31667e+06	790000	798333	2.63333e+06	1.70667e+06
pmb3002	607.1	299	3.98	608.1	[M-H]-	-	Chrysoeriol 7-O-rutinoside	Flavone	89566.7	49466.7	72700	51466.7	53633.3
pmb3023	449.1	287	3.37	450.1	[M-H]-	-	Eriodictyol C-hexoside	Flavone	86700	55966.7	54233.3	9	48433.3
pmb3028	535	491.3	3.75	536	[M-H]-	-	Tricin O-sinapic acid	Flavone	25700	7972.67	47633.3	32900	24400
pmb3039	703.1	329.2	5.99	704.1	[M-H]-	-	Tricin O-oxalic acid O-coumaroyl shikimic acid	Flavone	11046.7	21700	10876.7	9766.67	14033.3
pmb3041	521.1	329.2	3.81	522.1	[M-H]-	-	Tricin O-saccharic acid	Flavone	502000	395000	628667	1.00067e+06	658667
pmb3042	491.1	329.1	4	492.1	[M-H]-	-	Tricin 5-O-hexoside	Flavone	111433	99833.3	137667	227000	138333
pmb3047	657.1	495.1	4.5	658.1	[M-H]-	-	Tricin 4'-O-(syringyl alcohol) ether 5-O-hexoside	Flavone	297000	54600	228333	81766.7	166667
pme0332	577.2	269	4.01	578.16	[M-H]-	C12627	Apigenin 7-O-neohesperidoside (Rhoifolin)	Flavone	323333	300667	108800	46133.3	188000
pme0367	577.2	269	4.01	578.16	[M-H]-	-	Apigenin 7-rutinoside (Isorhoifolin)	Flavone	333667	262333	109667	41633.3	170333
pme0374	431.1	311	3.79	432.11	[M-H]-	C01714	Isovitexin	Flavone	65233.3	108967	52800	106767	87766.7
pme1510	269.1	251	5.94	270.05	[M-H]-	C10023	"Baicalein (5,6,7-Trihydroxyflavone)"	Flavone	16633.3	26766.7	12020	9	14766.7
pme1518	403.1	373	7.06	402.13	[M+H]+	C10112	Nobiletin	Flavone	222333	234333	232333	587333	312333
pme1550	373.1	343	7.54	372.12	[M+H]+	C10190	Tangeretin	Flavone	121667	132000	124667	156000	139667
pme2459	449.1	287.2	3.87	448.1	[M+H]+	C03951	Luteolin 7-O-glucoside (Cynaroside)	Flavone	3060000	1.40667e+06	2070000	360000	1840000
pme3224	577	413	3.67	578.16	[M-H]-	C12628	Vitexin 2''-O-beta-L-rhamnoside	Flavone	82766.7	9	9	14139.3	27866.7
pme3303	303	257	4.51	302.04	[M+H]+	C10192	Tricetin	Flavone	111336	9	9	473667	262667
pmf0006	581.2	273	4.05	580.53	[M+H]+	C09793	Narirutin	Flavone	186333	98100	258333	9	112000
pme1665	593.2	311	3.36	594.16	[M-H]-	C08064	Isovitexin 7-O-glucoside (Saponarin)	Flavonoid	19333.3	17200	22933.3	22200	20333.3
pmf0179	623.2	315.1	4.04	624.17	[M-H]-	-	Narcissoside	Flavonoid	3.11667e+06	1.19333e+06	449000	142667	1260000
pmf0204	465.1	303	3.73	464.1	[M+H]+	-	Hyperoside	Flavonoid	14500000	6.98333e+06	1.12267e+07	7.82667e+06	1.08233e+07
pmf0208	465.1	303	3.9	464.1	[M+H]+	-	Isoquercitroside	Flavonoid	1.41333e+07	7.79667e+06	1.11333e+07	9.16333e+06	1.26667e+07
pmf0233	595.1	291	4.92	594.14	[M+H]+	C17140	Tiliroside	Flavonoid	160333	492667	134333	145900	331333
pmf0247	449.1	299.2	3.46	448.1	[M+H]+	C10114	Orientin	Flavonoid	603000	492000	1310000	1.17333e+06	970667
pmf0279	465.1	229.2	3.81	464.1	[M+H]+	-	Gossypitrin	Flavonoid	196333	125333	213667	9	167333
pmf0302	435.1	289.1	4.3	434.12	[M+H]+	-	Engeletin	Flavonoid	52703	306667	24606	189000	232333
pmf0360	449.1	151	3.97	450.12	[M-H]-	C17449	Astilbin	Flavonoid	88400	1.31333e+06	50366.7	107167	413333
pmf0369	477.1	315	4.54	478.15	[M-H]-	-	Persicoside	Flavonoid	96700	197667	13536.3	192000	119333
pmf0374	477.1	314	4.19	478.11	[M-H]-	-	Isorhamnetin 3-O-glucoside	Flavonoid	2.93333e+06	866333	516667	74800	1.16333e+06
pmf0549	607.2	299	4.14	608.17	[M-H]-	C10039	Diosmin	Flavonoid	220333	114167	145667	110933	145667
pma0214	479	317.1	3.91	478	[M+H]+	-	methylQuercetin O-hexoside	Flavonol	576333	164167	104500	9	230000
pma6639	479.2	317.2	4.17	478.2	[M+H]+	-	Isorhamnetin O-hexoside	Flavonol	472667	198500	142000	49339.3	320000
pmb0565	509.1	347.2	3.41	508.1	[M+H]+	-	Syringetin 3-O-hexoside	Flavonol	2.17667e+06	9	9	1.00567e+07	3.03667e+06
pmb0595	479.2	317.2	4.17	478.2	[M+H]+	-	Isorhamnetin 5-O-hexoside	Flavonol	416336	98669.7	144667	37339.3	192000
pmb0711	611.2	303.1	3.7	610.2	[M+H]+	-	Quercetin 7-O-rutinoside	Flavonol	10700000	6.79667e+06	9.76333e+06	7.17333e+06	9140000
pmb3013	519.1	314.2	4.32	520.1	[M-H]-	-	Isorhamnetin O-acetyl-hexoside	Flavonol	33200	39066.7	41700	19233.3	38966.7
pmb3026	505.1	301.2	3.8	506.1	[M-H]-	-	Quercetin O-acetylhexoside	Flavonol	97100	127333	125333	82666.7	107333
pmb3894	329.1	229.1	5.91	330.1	[M-H]-	-	Di-O-methylquercetin	Flavonol	918333	613333	535333	67733.3	551333
pme0197	609.2	301	3.7	610.15	[M-H]-	C05625	Quercetin 3-O-rutinoside (Rutin)	Flavonol	3.95667e+07	3.47333e+07	4.62333e+07	2.78333e+07	36300000
pme0199	301	151	5.12	302.04	[M-H]-	C00389	Quercetin	Flavonol	31800	8069.67	21633.3	18833.3	35300
pme0321	431.1	285	4.94	432.11	[M-H]-	-	Kaempferol 7-O-rhamnoside	Flavonol	58533.3	59166.7	36533.3	24366.7	47933.3
pme0369	593.2	285	3.83	594.16	[M-H]-	-	Kaempferol 3-O-rutinoside (Nicotiflorin)	Flavonol	8.62333e+06	6.14667e+06	7.56667e+06	1.07667e+06	6180000
pme1539	623.2	314	3.66	624.17	[M-H]-	-	Isorhamnetin 3-O-neohesperidoside	Flavonol	694667	264667	87600	31366.7	274333
pme1551	463.1	316	3.63	464.1	[M-H]-	C10108	Myricetin 3-O-rhamnoside (Myricitrin)	Flavonol	1.48667e+06	1690000	1310000	1038000	1450000
pme1605	593.2	285	3.76	594.16	[M-H]-	-	Kaempferol 3-O-robinobioside (Biorobin)	Flavonol	8610000	5.99667e+06	7.78667e+06	1.03633e+06	6240000
pme1622	447.1	285	3.93	448.1	[M-H]-	C12249	Kaempferol 3-O-glucoside (Astragalin)	Flavonol	1.11667e+06	651000	619000	101800	662333
pme2898	321.1	303	3.52	320.05	[M+H]+	C02906	Dihydromyricetin	Flavonol	4930000	2560000	4200000	2400000	4.03667e+06
pme3129	463	301	3.86	464.1	[M-H]-	-	Quercetin 4'-O-glucoside (Spiraeoside)	Flavonol	1.07133e+07	7.88333e+06	9000000	472667	7260000
pme3211	463	301	3.86	464.1	[M-H]-	C05623	Quercetin 3-O-glucoside (Isotrifoliin)	Flavonol	1.06667e+07	7.52333e+06	9.22333e+06	453333	7350000
pme3268	449	287	3.87	448.1	[M+H]+	C12626	Kaempferol 3-O-galactoside (Trifolin)	Flavonol	2.85333e+06	1.52067e+06	2510000	420333	1.85333e+06
pme3296	431	285	4.48	432.11	[M-H]-	C16911	Kaempferol 3-O-rhamnoside (Kaempferin)	Flavonol	51866.7	60533.3	37000	27133.3	47700
pme3396	289	215	3.65	288.06	[M+H]+	C01378	Fustin	Flavonol	340000	184667	394000	50403	305667
pme3484	479.1	315.5	3.53	480.09	[M-H]-	-	Myricetin 3-O-galactoside	Flavonol	141000	641667	30633.3	200333	233000
pme3514	301	151	5.11	302.04	[M-H]-	C10105	Morin	Flavonol	30033.3	3739.33	18933.3	22800	32666.7
pmb0312	176.1	91.2	3.7	175.1	[M+H]+	-	5-methoxyindole-3-carbaldehyde	Indole derivatives	138000	72333.3	71100	28306	115667
pmb0818	206.1	147.5	2.39	205.1	[M+H]+	C05660	Methoxyindoleacetic acid	Indole derivatives	4940000	3.89667e+06	6.91667e+06	3.65667e+06	5.48333e+06
pmb1096	118	91	2.39	117	[M+H]+	C00463	Indole	Indole derivatives	1.28667e+06	1016000	2.04667e+06	928333	1.49667e+06
pme0543	160.1	116	4.37	161.05	[M-H]-	-	Indole-5-carboxylic acid	Indole derivatives	270000	167333	145333	175667	160000
pme2720	144.1	126	4.53	145.05	[M-H]-	C08493	Indole-3-carboxaldehyde	Indole derivatives	66933.3	50200	84733.3	71166.7	69866.7
pme2836	178.1	160	2.95	177.08	[M+H]+	-	5-Hydroxytryptophol	Indole derivatives	182333	97736.3	391667	20906	173667
pme3263	269	225	4.43	270.05	[M-H]-	C02495	2'-Hydroxydaidzein	Isoflavone	46933.3	49500	44533.3	30266.7	35633.3
pme3502	429.1	267	4.59	430.13	[M-H]-	C10509	Formononetin 7-O-glucoside (Ononin)	Isoflavone	184000	333667	184667	326000	218000
pma0461	277.2	93.1	8.52	276.22	[M+H]+	-	"14,15-Dehydrocrepenynic acid"	Lipids	2.43667e+07	1.53833e+07	2.09333e+07	2.13333e+06	17000000
pma1303	492.3	184	8.43	491.31	[M+H]+	-	LysoPC 16:2	Lipids	1.19667e+06	944667	779333	781333	623667
pma3606	295.2	179.2	9.22	294.2	[M+H]+	-	"9-Hydroxy-(10E,12Z,15Z)-octadecatrienoic acid"	Lipids	4980000	3.90667e+06	5.61667e+06	463667	4.31667e+06
pmb0128	213.3	81	4.52	212.3	[M+H]+	-	delta-Tridecalactone	Lipids	7.24667e+06	5.49667e+06	4610000	743000	5.12333e+06
pmb0160	353.3	261.1	7.6	352.3	[M+H]+	-	MAG (18:3) isomer5	Lipids	2.48333e+06	25800000	2510000	7.50333e+06	1.12333e+07
pmb0164	355.1	147.2	8.46	354.1	[M+H]+	-	MAG (18:2) isomer1	Lipids	220333	648000	58339.3	407000	420667
pmb0165	494.3	184.1	8.55	493.3	[M+H]+	-	LysoPC 16:1	Lipids	2.72333e+07	1.54433e+07	2.58667e+07	9	1.67667e+07
pmb0168	700.1	184.4	9.33	699.1	[M+H]+	-	PC 16:1/14:1	Lipids	4.18667e+06	3.91367e+06	4.03667e+06	4.15333e+06	3860000
pmb0292	387.1	331.1	7.65	386.1	[M+H]+	C00187	Cholesterol	Lipids	232667	310000	313000	674333	428667
pmb0848	494.3	184.2	7.88	493.3	[M+H]+	-	LysoPC 16:1 (2n isomer)	Lipids	1.24333e+07	5.40667e+07	7.44333e+06	2.85333e+07	22500000
pmb0852	520.3	502.2	8.43	519.3	[M+H]+	-	LysoPC 18:2	Lipids	1.57667e+06	6170000	1840000	1340000	2.71667e+06
pmb0854	518.3	459.3	8.79	517.3	[M+H]+	-	LysoPC 18:3	Lipids	25800000	6.95667e+07	2.09667e+07	1.41333e+07	3.78333e+07
pmb0855	496.3	184.2	8.8	495.3	[M+H]+	-	LysoPC 16:0	Lipids	1.88333e+06	1.04333e+07	1.26333e+06	939667	3.02667e+06
pmb0859	522.4	184	8.91	521.4	[M+H]+	-	LysoPC 18:1 (2n isomer)	Lipids	13100000	936673	1.58333e+07	2.06333e+06	20100000
pmb0862	440.1	184.5	6.77	439.1	[M+H]+	-	LysoPC 12:1	Lipids	267000	284333	180000	163000	223333
pmb0863	492.3	184	7.34	491.3	[M+H]+	-	LysoPC 16:2 (2n isomer)	Lipids	9.10667e+06	3.05167e+07	4690000	12300000	13700000
pmb0864	426.3	285.2	7.69	425.3	[M+H]+	-	LysoPE 14:0	Lipids	709333	1.19467e+06	469333	171667	830333
pmb0865	518.2	184.1	7.71	517.2	[M+H]+	-	LysoPC 18:3 (2n isomer)	Lipids	2.25667e+07	66000000	23300000	24100000	4.07333e+07
pmb0866	468.1	184.4	7.74	467.1	[M+H]+	-	LysoPC 14:0	Lipids	5960000	19110000	3.49667e+06	5.05333e+06	9370000
pmb0873	520	184.5	8.25	519	[M+H]+	-	LysoPC 18:2 (2n isomer)	Lipids	452000	2.12067e+06	511000	401333	775000
pmb0874	478.6	460.6	8.38	477.6	[M+H]+	-	LysoPE 18:2 (2n isomer)	Lipids	922333	3950000	1.10333e+06	901333	1.49667e+06
pmb0880	482.1	313.8	8.98	481.1	[M+H]+	-	LysoPE 18:0 (2n isomer)	Lipids	203667	341100	146333	9	98666.7
pmb0882	522.1	504.2	9.07	521.1	[M+H]+	-	LysoPC 18:1	Lipids	3470000	30600000	5.51667e+06	4.39667e+06	1.14233e+07
pmb0883	482.1	341.7	9.86	481.1	[M+H]+	-	LysoPE 18:0	Lipids	2.75667e+06	5650000	4.22333e+06	149333	670333
pmb0889	279.3	95.1	8.96	278.3	[M+H]+	C08364	Punicic acid	Lipids	5090000	1.96333e+06	4750000	846667	3580000
pmb0890	355.1	263.3	10.52	354.1	[M+H]+	-	MAG (18:2)	Lipids	54233.3	178700	66166.7	41533.3	107100
pmb1574	277.2	93	8.21	276.2	[M+H]+	-	Octadecadien-6-ynoic acid	Lipids	3.03667e+06	1550000	1.84333e+06	265000	1.89333e+06
pmb1605	353.3	261.4	8.45	352.3	[M+H]+	-	MAG (18:3) isomer3	Lipids	1.22667e+06	1.09467e+07	1.10433e+06	3880000	5080000
pmb1650	279.2	149.4	9.71	278.2	[M+H]+	-	"Octadeca-11E,13E,15Z-trienoic acid"	Lipids	6620000	4120000	7.43333e+06	6.11667e+06	5590000
pmb1656	353.1	335.1	9.9	352.1	[M+H]+	-	MAG (18:3) isomer4	Lipids	771667	2530000	981667	628000	1.49667e+06
pmb2221	318.3	60.1	6.95	317.3	[M+H]+	C12144	4-Hydroxysphinganine	Lipids	54566.7	32036.3	69900	34166.7	36100
pmb2251	694.1	353.7	7.6	693.1	[M+H]+	-	DGMG (18:1)	Lipids	26866.7	317000	26833.3	56433.3	112000
pmb2260	480.1	184.5	7.76	479.1	[M+H]+	-	LysoPC 15:1	Lipids	309000	672000	237000	112000	356667
pmb2319	482.3	184.1	8.26	481.3	[M+H]+	-	LysoPC 15:0	Lipids	9.23333e+06	2.60367e+07	7410000	4.48333e+06	12300000
pmb2325	353.1	261.8	8.42	352.1	[M+H]+	-	MAG (18:3) isomer2	Lipids	1590000	1.23533e+07	1.53667e+06	5230000	6.51333e+06
pmb2388	524.1	184	8.91	523.1	[M+H]+	-	LysoPC 18:0 (2n isomer)	Lipids	2.39667e+06	1.16067e+07	3.07667e+06	959667	4.94333e+06
pmb2406	510.1	184.4	9.34	509.1	[M+H]+	-	LysoPC 17:0	Lipids	2.87333e+07	8.92333e+07	3.04667e+07	1.18067e+06	1.40667e+07
pmb2444	353.2	261.3	10.06	352.2	[M+H]+	-	MAG (18:3) isomer1	Lipids	1.07667e+06	3910000	1.23667e+06	872000	1.94333e+06
pmb2640	199	181	9.66	200	[M-H]-	C02679	Lauric acid (C12:0)	Lipids	19866.7	7340	19200	14900	15866.7
pmb2643	225	207	10.05	226	[M-H]-	C08322	Myristoleic acid (C14:1)	Lipids	65333.3	19700	28233.3	156333	57866.7
pmb2778	295	277.3	8.96	296	[M-H]-	-	"9,10-EODE"	Lipids	620333	243000	565333	93733.3	395333
pmb2784	293.2	275.1	10.21	294.2	[M-H]-	-	13-HOTrE	Lipids	296333	96400	203667	563333	289667
pmb2786	293	275	8.42	294	[M-H]-	-	9-HOTrE	Lipids	209667	88700	114000	19666.7	117000
pmb2787	293.2	275.1	9.19	294.2	[M-H]-	-	9-KODE	Lipids	58100	33500	66333.3	9	47366.7
pmb2791	309.1	209.1	7.55	310.1	[M-H]-	-	9-HpOTrE	Lipids	894000	1.16333e+06	542000	37236.3	700333
pmb2792	293	193.1	7.81	294	[M-H]-	-	13-HOTrE(r)	Lipids	76833.3	67000	94333.3	127200	76466.7
pmb3116	474.2	278.3	7.72	475.2	[M-H]-	-	LysoPE 18:3	Lipids	117000	184667	103900	153000	189333
pmb3117	452	255.3	8.74	453	[M-H]-	-	LysoPE 16:0	Lipids	3.92333e+07	7.36667e+07	27000000	3440000	26300000
pmb3121	478.1	281.3	9.03	479.1	[M-H]-	-	LysoPE 18:1	Lipids	1.73667e+06	6.78333e+06	1.35333e+06	940333	2.79333e+06
pmb3132	478.1	281.2	8.86	479.1	[M-H]-	-	LysoPE 18:1 (2n isomer)	Lipids	2.15667e+06	8.18333e+06	1660000	1.11267e+06	3.24333e+06
pmb5304	277.1	241.2	10.62	278.1	[M-H]-	C06427	α-Linolenic acid	Lipids	122667	152333	125667	33900	118667
pmc0960	544.4	485.2	8.91	543.4	[M+H]+	-	LysoPC 20:4	Lipids	4.52667e+06	29300000	1.11067e+07	9.31667e+06	2.24333e+07
pmd0130	468.3	184	7.73	467.3	[M+H]+	-	LysoPC 14:0 (2n isomer)	Lipids	1.21333e+07	3.81333e+07	6980000	1.04667e+07	1.91667e+07
pmd0132	496.3	184	8.8	495.33	[M+H]+	-	LysoPC 16:0 (2n isomer)	Lipids	1850000	1.07733e+07	1.24667e+06	928667	3.03333e+06
pmd0136	524.4	184	9.91	523.36	[M+H]+	-	LysoPC 18:0	Lipids	96100000	2.78133e+08	1.15067e+08	4.89333e+06	33000000
pmd0144	550.4	184	9.96	549.37	[M+H]+	-	LysoPC 20:1 (2n isomer)	Lipids	129767	706667	233000	189000	471000
pmd0145	550.4	184.1	10	549.37	[M+H]+	-	LysoPC 20:1	Lipids	128733	745667	112567	190000	456000
pmd0158	424.2	227.2	7.51	425.2	[M-H]-	-	LysoPE 14:0 (2n isomer)	Lipids	466000	924667	334667	124667	559000
pmd0160	452.3	255.2	8.73	453.3	[M-H]-	-	LysoPE 16:0 (2n isomer)	Lipids	4.82667e+07	83000000	3.28333e+07	4190000	31800000
pme2827	239	223	6.77	240.25	[M-H]-	C00517	Palmitaldehyde	Lipids	8.20667e+06	2.16667e+06	2.03667e+06	1540000	2.21333e+07
pmf0293	269.3	209.2	12.27	270.29	[M-H]-	C01924	1-Octadecanol	Lipids	124333	131333	131000	121667	133000
pmf0297	297.3	183.1	9.29	298.32	[M-H]-	-	1-Eicosanol	Lipids	6930000	1630006	5000000	7950000	7240000
pmf0396	281.2	105.1	12.24	280.24	[M+H]+	C01595	Linoleic acid	Lipids	95666.7	97733.3	73766.7	60033.3	93900
pmf0399	309.3	227.3	10.72	310.29	[M-H]-	C16526	cis-Gondoic acid	Lipids	2870000	1.71333e+06	3060000	1.40667e+06	2850000
pmf0402	367.4	285.4	10.84	368.37	[M-H]-	C08320	Lignoceric acid	Lipids	393000	264033	539333	270333	121333
pmb0197	298.1	166.3	1.16	297.1	[M+H]+	-	N2-methylguanosine	Nucleotide and derivates	1.01267e+06	686667	1.28333e+06	559667	966667
pmb0530	664.2	136.2	1.16	663.2	[M+H]+	C00003	Nicotinic acid adenine dinucleotide	Nucleotide and derivates	339000	69130	171333	173667	184667
pmb0532	349.1	137.3	1.16	348.1	[M+H]+	C00130	Inosine 5'-monophosphate	Nucleotide and derivates	125267	37266.7	66066.7	111333	69133.3
pmb2922	565.1	323.1	1.11	566.1	[M-H]-	C00029	Uridine 5'-diphospho-D-glucose	Nucleotide and derivates	7600000	9.26667e+06	5.51667e+06	8310000	5550000
pmb2948	346.1	210.9	0.85	347.1	[M-H]-	C01367	Adenosine 3'-monophosphate	Nucleotide and derivates	73100	5339.33	45433.3	55700	37733.3
pmb4344	362.1	79.1	1.01	363.1	[M-H]-	C00144	Guanosine 5'-monophosphate	Nucleotide and derivates	78833.3	30466.7	57100	79766.7	43866.7
pmc0066	333.1	137.1	0.7	332.05	[M+H]+	C06196	2'-Deoxyinosine-5'-monophosphate	Nucleotide and derivates	2.34667e+06	63533.3	1.38667e+06	585667	2.02333e+06
pmc0274	167.1	121.1	1.92	166.1	[M+H]+	C16614	6-Methylmercaptopurine	Nucleotide and derivates	57400000	4.08667e+07	7.51333e+07	48200000	5.52667e+07
pmc0281	400.2	136.1	1.94	399.2	[M+H]+	-	Adenosine O-ribose	Nucleotide and derivates	6140000	4.12667e+06	1.03667e+07	4550000	6950000
pmc0304	384.1	252	2.06	383.12	[M+H]+	-	Succinyladenosine	Nucleotide and derivates	43900000	2.38667e+07	2.96333e+07	2.60667e+07	3.41333e+07
pmd0023	266	134	1.81	267	[M-H]-	C00212	Adenosine	Nucleotide and derivates	133333	143000	54000	115333	107333
pme0005	121	94	1.44	120.04	[M+H]+	C15587	Purine	Nucleotide and derivates	14436.3	8872.67	35700	10436.3	24933.3
pme0033	137	119	1.16	136.04	[M+H]+	C00262	Hypoxanthine	Nucleotide and derivates	4.11667e+06	3.11667e+06	6400000	3.38333e+06	4.73667e+06
pme0038	112	95	0.82	111.04	[M+H]+	C00380	Cytosine	Nucleotide and derivates	2.91667e+06	2.59667e+06	2900000	2740000	3260000
pme0040	136.1	119	1.16	135.05	[M+H]+	C00147	Adenine	Nucleotide and derivates	82669.7	162667	73103	9	136000
pme0108	126.1	109	1.16	125.06	[M+H]+	C02376	5-Methylcytosine	Nucleotide and derivates	1.29667e+06	1.83867e+06	3720000	2500000	5.28333e+06
pme0130	165.1	150	1.85	166.05	[M-H]-	C16357	3-Methylxanthine	Nucleotide and derivates	11266.7	14033.3	20166.7	14600	16300
pme0183	152.1	135	0.86	151.05	[M+H]+	-	2-Hydroxy-6-aminopurine	Nucleotide and derivates	1680000	1.49333e+06	622333	1410000	1.12433e+06
pme0256	151	151	1.19	152.03	[M-H]-	C00385	Xanthine	Nucleotide and derivates	760333	240333	2.93333e+06	248667	1.09333e+06
pme0264	243.1	127	1.99	242.09	[M+H]+	C00214	Thymidine	Nucleotide and derivates	946667	916667	909667	910667	961000
pme1063	243.1	110	1.24	244.07	[M-H]-	C00299	Uridine	Nucleotide and derivates	1620000	1.12533e+06	683667	1030000	1.19333e+06
pme1107	150	133	1.32	151.05	[M-H]-	C00242	Guanine	Nucleotide and derivates	253667	274667	76866.7	218667	172333
pme1119	269.1	137	0.83	268.08	[M+H]+	C00294	Inosine	Nucleotide and derivates	68903	9	65866.7	38166.7	72666.7
pme1175	282.1	150	1.5	283.09	[M-H]-	C00387	Guanosine	Nucleotide and derivates	5.86667e+06	5.09333e+06	3.54667e+06	3.73667e+06	4.67667e+06
pme1294	283	151	1.75	284.08	[M-H]-	C01762	Xanthosine	Nucleotide and derivates	6.96667e+07	11400000	55800000	1.12667e+07	36300000
pme1373	306	110	1.17	307.06	[M-H]-	C00239	2'-Deoxycytidine-5'-monophosphate	Nucleotide and derivates	308000	159000	119767	59200	45400
pme1378	282.1	149.6	2.27	281.11	[M+H]+	C02494	1-Methyladenosine	Nucleotide and derivates	152667	82900	82666.7	115667	115333
pme1473	296	134	2.9	297.09	[M-H]-	C00170	5'-Deoxy-5'-(methylthio)adenosine	Nucleotide and derivates	236333	212333	169333	230333	288333
pme2278	362	211	1.17	363.06	[M-H]-	-	Guanosine monophosphate	Nucleotide and derivates	123000	46900	84666.7	84166.7	58166.7
pme2555	346	134	1.16	347.06	[M-H]-	C00020	Adenosine 5'-monophosphate	Nucleotide and derivates	172667	32100	106467	154000	111000
pme2765	181.1	124	2.69	180.07	[M+H]+	C13747	"1,7-Dimethylxanthine"	Nucleotide and derivates	1.49667e+06	699333	706667	1.53333e+06	1.09667e+06
pme2776	253.1	137	1.67	252.09	[M+H]+	C05512	2'-Deoxyinosine	Nucleotide and derivates	196667	104670	206000	129333	167333
pme3007	403	159	0.7	404.16	[M-H]-	C00015	Uridine 5’-diphosphate	Nucleotide and derivates	853333	610000	588000	686000	401667
pme3101	148	107	1.15	149.07	[M-H]-	C02216	1-Methyladenine	Nucleotide and derivates	75033.3	89466.7	62433.3	51366.7	57766.7
pme3171	322	97	0.82	323.05	[M-H]-	C00055	Cytidine 5'-monophosphate (Cytidylic acid)	Nucleotide and derivates	29636.3	8106	7672.67	9306	28733.3
pme3184	332	136	1.17	331.07	[M+H]+	C00360	2'-Deoxyadenosine-5'-monophosphate	Nucleotide and derivates	3000000	1.64333e+06	1.35333e+06	1.18333e+07	4450000
pme3188	323	211	1.18	324.04	[M-H]-	C00105	Uridine 5'-monophosphate	Nucleotide and derivates	628667	195667	420000	353333	357333
pme3336	382	206	2.06	383.11	[M-H]-	-	N6-Succinyl Adenosine	Nucleotide and derivates	3790000	2540000	2.30333e+06	1.92667e+06	2.55333e+06
pme3732	244.1	112	0.83	243.09	[M+H]+	C00475	Cytidine	Nucleotide and derivates	263000	111003	149000	161333	246000
pme3835	344.2	150	1.33	345.05	[M-H]-	C00942	"Guanosine 3',5'-cyclic monophosphate"	Nucleotide and derivates	546333	188333	396667	209667	372000
pme3960	250	134	1.88	251.1	[M-H]-	C00559	Deoxyadenosine	Nucleotide and derivates	74466.7	56866.7	38300	19866.7	40900
pme3967	312	180	2.18	311.12	[M+H]+	-	2-(dimethylamino)guanosine	Nucleotide and derivates	1.86667e+06	1124000	1530000	884000	1.55333e+06
pme3970	243	153	1.21	244.07	[M-H]-	C02067	β-Pseudouridine	Nucleotide and derivates	111700	29766.7	42600	21269.7	48800
pme3982	267.1	135	1.48	268.08	[M-H]-	-	Hypoxanthine-9-β-D-arabinofuranoside	Nucleotide and derivates	1.52333e+06	293333	443667	349000	641000
pmf0118	565.1	322.9	0.8	610.02	[M-2Na+H]-	-	Uridine 5'-diphosphoglucose disodium salt	Nucleotide and derivates	8.79333e+06	9380000	6.23667e+06	8.29667e+06	6.06667e+06
pmf0136	565.1	322.9	0.8	566.06	[M-H]-	C00029	UDP-α-D-glucose	Nucleotide and derivates	8240000	9.34667e+06	6130000	8720000	6.14667e+06
pmf0289	336.2	148	4.36	335.16	[M+H]+	C16427	Riboprine	Nucleotide and derivates	119000	87766.7	40769.7	9	83266.7
pma0110	399	207.2	3.17	398	[M+H]+	-	O-Sinapoyl quinic acid	Organic acids and derivatives	109267	81300	46533.3	177667	97466.7
pma0149	341.1	207.1	2.28	340.08	[M+H]+	C02887	Sinapoyl malate	Organic acids and derivatives	9.15667e+06	6150000	5.94667e+06	9140000	7.89667e+06
pma3649	132.1	86.1	1.01	131.1	[M+H]+	C00430	5-Aminolevulinate	Organic acids and derivatives	1.61333e+07	1.24933e+07	1.81667e+07	1.70333e+07	1.75333e+07
pma3724	369.1	177.1	3.42	368.1	[M+H]+	-	1-O-Feruloyl quinic acid	Organic acids and derivatives	172333	56033.3	14839.3	36300	75600
pma6281	145.1	101.1	0.75	146.06	[M-H]-	-	Methylglutaric acid	Organic acids and derivatives	54233.3	19466.7	279333	114000	124333
pmb0750	355.1	163.1	2.35	354.1	[M+H]+	C17147	Neochlorogenic acid (5-O-Caffeoylquinic acid)	Organic acids and derivatives	93003	286333	61969.7	56436.3	167000
pmb0751	321.1	147.3	3.81	320.1	[M+H]+	-	5-O-p-Coumaroyl shikimic acid	Organic acids and derivatives	1170000	674000	884333	127333	760667
pmb1318	457.2	209.2	4.48	456.2	[M+H]+	-	8-Methyl-2-oxo-4-phenyl-2H-chromen-7-yl 4-(hexyloxy)benzoate	Organic acids and derivatives	8.61667e+06	6.29667e+06	5400000	3.18667e+06	6.38667e+06
pmb1912	474.2	327	2.3	473.2	[M+H]+	C00234	10-Formyl-THF	Organic acids and derivatives	24800000	2.45067e+06	2.76667e+07	20900000	18400000
pmb2497	197	153	0.71	198	[M-H]-	C05584	4-Hydroxy-3-methoxymandelate	Organic acids and derivatives	149333	74166.7	134333	71233.3	100533
pmb2556	345.1	167.1	2.27	346.1	[M-H]-	-	Syringaldehyde O-glucoside	Organic acids and derivatives	49833.3	48800	45633.3	21036.3	43000
pmb2654	460.1	117.9	0.78	461.1	[M-H]-	-	Anthranilate O-hexosyl-O-hexoside	Organic acids and derivatives	717667	826000	343000	1.21333e+06	839333
pmb2657	289.1	97.1	0.71	290.1	[M-H]-	C03406	Argininosuccinate	Organic acids and derivatives	317333	171667	100433	534000	198333
pmb2826	147	87.1	1.03	148	[M-H]-	C00815	Citramalate	Organic acids and derivatives	232667	200667	108700	318667	234000
pmb2871	315.1	153	1.84	316.1	[M-H]-	-	"2,5-dihydroxy benzoic acid O-hexside"	Organic acids and derivatives	5.69333e+06	9	9	3.69333e+06	3.36667e+06
pmb2928	331	313.1	2.02	332	[M-H]-	-	Gallic acid O-Hexoside	Organic acids and derivatives	1180000	207667	332333	706333	584667
pmb2938	353.1	100.9	3	354.1	[M-H]-	-	4-O-Caffeoyl quinic acid (criptochlorogenic acid)	Organic acids and derivatives	1830000	1.56667e+06	749667	711333	1.09767e+06
pmb3066	481.1	319.2	2.62	482.1	[M-H]-	-	5-O-p-coumaroyl shikimic acid O-hexoside	Organic acids and derivatives	129667	200333	217667	386667	223333
pmb3072	481.1	319.3	3.23	482.1	[M-H]-	-	3-O-p-coumaroyl shikimic acid O-hexoside	Organic acids and derivatives	580000	225333	264000	1740000	674667
pmb3074	337.1	191.1	3.3	338.1	[M-H]-	-	3-O-p-Coumaroyl quinic acid	Organic acids and derivatives	5.78667e+06	1.27667e+07	3.34667e+06	962000	5150000
pmb3075	319	145.1	3.93	320	[M-H]-	-	3-O-p-Coumaroyl shikimic acid	Organic acids and derivatives	47600	25466.7	44533.3	76766.7	39766.7
pmb3099	153	125	1.56	154	[M-H]-	C06608	Diethyl phosphate	Organic acids and derivatives	2.12667e+06	2.06667e+06	2.08333e+06	1.68667e+06	1.62667e+06
pmb3101	175.1	115	2.75	176.1	[M-H]-	C02504	2-Isopropylmalate	Organic acids and derivatives	636000	578667	258333	525333	466000
pmb3107	359.1	182.1	2.26	360.1	[M-H]-	-	Syringic acid O-glucoside	Organic acids and derivatives	526667	370333	438333	435000	438333
pme0049	110	92	0.76	109.02	[M+H]+	C00519	2-Aminoethanesulfinic acid	Organic acids and derivatives	997333	691333	765667	960667	884000
pme0085	359.3	196.7	3.87	360.3	[M-H]-	C01850	Rosmarinic acid	Organic acids and derivatives	318333	294667	349667	70766.7	270333
pme0234	190	144	2.66	189.04	[M+H]+	C01717	Kynurenic acid	Organic acids and derivatives	5.16333e+06	2.53833e+06	10700000	5480000	5.68333e+06
pme0237	183.1	137	4.77	182.06	[M+H]+	-	"Ethyl 3,4-Dihydroxybenzoate (Ethyl protocatechuate)"	Organic acids and derivatives	9	9	9	469333	104800
pme0239	111	67	2.14	112.02	[M-H]-	-	2–furanoic acid	Organic acids and derivatives	109433	150333	113900	96766.7	156333
pme0241	123	79	4.57	122.04	[M+H]+	C00180	Benzoic acid	Organic acids and derivatives	55603	66966.7	28103	149333	102100
pme0243	131	87	1.86	132.04	[M-H]-	C00489	Glutaric acid	Organic acids and derivatives	149000	88433.3	169000	152000	208667
pme0250	187.1	125	4.47	188.1	[M-H]-	C08261	Azelaic acid	Organic acids and derivatives	17700000	1.74333e+07	1.49333e+07	9220000	1.51667e+07
pme0267	131	87	2.12	132.04	[M-H]-	-	2-Methylsuccinic acid	Organic acids and derivatives	5250000	5840000	4790000	3290000	4.69667e+06
pme0281	165	121	2.96	166.03	[M-H]-	C06337	Terephthalic acid	Organic acids and derivatives	5250000	6.23333e+06	5.01667e+06	4.51667e+06	5140000
pme0282	165	77	2.95	166.03	[M-H]-	C01606	Phthalic acid	Organic acids and derivatives	466667	570333	430000	385000	485333
pme0284	144.1	102	0.84	145.09	[M-H]-	C01035	4-Guanidinobutyric acid	Organic acids and derivatives	56672.7	437667	280333	247000	251333
pme0286	131.1	85	3.52	132.08	[M-H]-	-	2-Hydroxyisocaproic acid	Organic acids and derivatives	69733.3	121000	97800	209667	139333
pme0295	146.1	86	1.62	145.07	[M+H]+	-	4-Acetamidobutyric acid	Organic acids and derivatives	574333	376336	1.23667e+06	59803	590333
pme0309	183	124	3.14	184.04	[M-H]-	-	Methyl gallate	Organic acids and derivatives	993667	554333	222000	703333	708333
pme0397	173.1	93	0.81	174.05	[M-H]-	C00493	Shikimic acid	Organic acids and derivatives	624333	221000	264000	278000	329667
pme0399	355.1	163	2.72	354.1	[M+H]+	C00852	Chlorogenic acid (3-O-Caffeoylquinic acid)	Organic acids and derivatives	96003	248670	109200	21839.3	168000
pme0413	151	136	4	152.05	[M-H]-	C00755	Vanillin	Organic acids and derivatives	1.09167e+06	606000	653667	417333	661667
pme0486	117	73	1.33	118.03	[M-H]-	C02170	Methylmalonic acid	Organic acids and derivatives	4.80333e+06	8.15667e+06	1.27333e+07	3.17333e+06	1.06033e+07
pme1162	169	125	1.74	170.02	[M-H]-	C01424	Gallic acid	Organic acids and derivatives	1.20133e+06	9	119006	85672.7	415333
pme1292	167.1	123	2.12	168.04	[M-H]-	C00544	Homogentisic acid	Organic acids and derivatives	6760000	3.77667e+06	3890000	6390000	5.22333e+06
pme1683	477.2	258	2.15	476.17	[M+H]+	C12276	D-Pantothenic dcid	Organic acids and derivatives	2.60667e+06	2328000	2.76333e+06	2.61667e+06	2.64667e+06
pme1711	117.1	59	2.03	118.06	[M-H]-	-	3-Hydroxy-3-methyl butyric acid	Organic acids and derivatives	520667	606667	506000	404667	502667
pme1730	117	59	0.74	118.03	[M-H]-	-	D-Erythronolactone	Organic acids and derivatives	444667	452333	356667	467000	435667
pme1806	367	190.9	3.64	368.11	[M-H]-	-	Chlorogenic acid methyl ester	Organic acids and derivatives	2.07333e+06	1.18333e+06	243333	432000	966667
pme1814	153	108	2.5	154.03	[M-H]-	C00628	"2,5-dihydroxybenzoic acid (Gentisic acid)"	Organic acids and derivatives	685333	333000	734333	459000	577333
pme1830	117	73	1.35	118.03	[M-H]-	C00042	Succinic acid	Organic acids and derivatives	4.53667e+06	8.91333e+06	1.33667e+07	2850000	1.05667e+07
pme1851	130.1	88	0.81	131.07	[M-H]-	C00300	Creatine	Organic acids and derivatives	660667	513667	691333	654333	945667
pme1934	112.1	83	0.62	113.06	[M-H]-	C00791	Creatinine	Organic acids and derivatives	69833.3	47033.3	35933.3	37933.3	41366.7
pme1980	175.1	83	3.86	174.09	[M+H]+	C08278	Suberic acid	Organic acids and derivatives	203000	136833	115667	265333	206000
pme2009	149	87	1.03	150.02	[M-H]-	-	L-(+)-Tartaric acid	Organic acids and derivatives	122000	108300	153333	116400	154000
pme2036	191	85	0.92	192.06	[M-H]-	C00296	Quinic acid	Organic acids and derivatives	740667	655000	1.04833e+06	706667	942000
pme2050	191	111	0.86	192.03	[M-H]-	C00158	Citric acid	Organic acids and derivatives	7.45333e+06	6.52333e+06	9730000	6850000	9.07667e+06
pme2129	131.1	85	3.58	132.08	[M-H]-	-	(S)-(-)-2-Hydroxyisocaproic acid	Organic acids and derivatives	534333	952000	973667	1500000	946333
pme2169	115	71	1.19	116.01	[M-H]-	C00122	Fumaric acid	Organic acids and derivatives	9	479667	881333	1440000	1.52333e+06
pme2362	151	107	2.89	152.05	[M-H]-	C01984	Mandelic acid	Organic acids and derivatives	71133.3	122000	73533.3	9	62000
pme2550	173	137	0.77	174.02	[M-H]-	C00417	Cis-Aconitic acid	Organic acids and derivatives	201333	72600	65833.3	83133.3	102200
pme2598	167.1	123	2.44	168.04	[M-H]-	-	"3,4-Dihydroxybenzeneacetic acid"	Organic acids and derivatives	7040000	3610000	4.19333e+06	6.30333e+06	5270000
pme2603	152	108	2.66	153.04	[M-H]-	C00632	3-Hydroxyanthranilic acid	Organic acids and derivatives	550000	303000	406333	385667	413667
pme2670	121	92	3.72	122.04	[M-H]-	C00633	4-Hydroxybenzaldehyde	Organic acids and derivatives	5630000	6.42667e+06	6.61667e+06	3.58667e+06	5350000
pme2706	153.2	109	2.42	154.03	[M-H]-	C00196	"2,3-Dihydroxybenzoic acid"	Organic acids and derivatives	725333	435667	927667	447333	648333
pme2761	161	73	0.95	162.02	[M-H]-	C01127	4-Hydroxy-2-oxoglutaric acid	Organic acids and derivatives	257000	184333	206667	176000	205000
pme2901	353.1	191.1	2.38	354.1	[M-H]-	-	1-O-Caffeoyl quinic acid	Organic acids and derivatives	144667	192000	148000	85166.7	130667
pme2903	137	93	3.1	138.03	[M-H]-	C00156	4-Hydroxybenzoic acid	Organic acids and derivatives	1.87333e+07	1.90667e+07	1.43667e+07	23300000	1.95333e+07
pme3009	175	99	0.63	174.02	[M+H]+	-	trans-Citridic acid	Organic acids and derivatives	406667	400333	261000	347667	361333
pme3069	556.3	371	10.27	555.28	[M+H]+	C05122	Taurocholic acid	Organic acids and derivatives	1.50333e+07	1.52333e+07	1.69333e+07	1.41667e+07	1.62333e+07
pme3083	164	120	3.87	165.04	[M-H]-	-	2-(Formylamino)benzoic acid	Organic acids and derivatives	1.18333e+06	387333	533667	458333	642667
pme3096	118	74	1.34	119.02	[M-H]-	C00872	Aminomalonic acid	Organic acids and derivatives	136670	209336	497667	9	405000
pme3198	153	109	2.75	154.03	[M-H]-	-	"2,4-Dihydroxybenzoic acid"	Organic acids and derivatives	901333	506667	1050000	333003	849667
pme3207	141	59	0.69	142.03	[M-H]-	-	"trans,trans-Muconic acid"	Organic acids and derivatives	594667	30166.7	270000	128600	432333
pme3309	145.1	101	2.58	146.06	[M-H]-	-	2-Methylglutaric acid	Organic acids and derivatives	1.07667e+06	1.25333e+06	1.09333e+06	895333	1.07667e+06
pme3346	131.1	85	2.76	132.08	[M-H]-	-	5-hydroxyhexanoic acid	Organic acids and derivatives	374333	376667	371333	432000	404667
pme3719	165.1	75	0.75	166.05	[M-H]-	-	D-Xylonic acid	Organic acids and derivatives	1.39667e+06	906667	709000	1070000	1220000
pmf0066	665.2	160.9	4.28	666.62	[M-H]-	-	2'-Acetylacteoside	Organic acids and derivatives	21069.7	120000	15869.7	58369.7	63900
pmf0096	88.9	70.9	1.13	90.03	[M-H]-	C00209	Oxalic acid	Organic acids and derivatives	207667	152333	140000	170667	176333
pmf0131	353.1	135.1	2.92	354.1	[M-H]-	-	Cryptochlorogenic acid	Organic acids and derivatives	9.62333e+06	8450000	3.80667e+06	3.89667e+06	5040000
pmf0218	167	78.8	0.84	233.99	[M-3Na+2H]-	-	Phosphoenolpyruvate trisodium salt	Organic acids and derivatives	671667	699667	419333	611667	440333
pmf0245	143	69	1.5	142.03	[M+H]+	C14516	Kojic acid	Organic acids and derivatives	485667	196000	300667	319667	370333
pmf0280	193	113.1	0.79	194.04	[M-H]-	C00333	D-Galacturonic acid	Organic acids and derivatives	2.36667e+06	2.57333e+06	2.61333e+06	2.54333e+06	2530000
pmf0413	213.1	153	4.67	212.07	[M+H]+	C11155	Propyl gallate	Organic acids and derivatives	1.94333e+06	1.50967e+06	1.35333e+06	274667	1440000
pmf0419	285.1	121	2.65	286.11	[M-H]-	C01451	Salicin	Organic acids and derivatives	139667	34000	46600	55200	75866.7
pmf0420	149	74.9	4.37	150.07	[M-H]-	C15513	Benzyl acetate	Organic acids and derivatives	271233	208033	163933	75600	327333
pmf0425	149	87	0.84	150.02	[M-H]-	C02107	D-tartaric acid	Organic acids and derivatives	119333	107700	141667	97200	143000
pmf0426	939	769	3.76	940.12	[M-H]-	C04576	Pentagalloylglucose	Organic acids and derivatives	48633.3	55400	74133.3	43266.7	61233.3
pmf0482	515.1	191	3.13	516.13	[M-H]-	C10445	Cynarin	Organic acids and derivatives	9	9	110333	9	25500
pmf0578	191	111	1.18	192.03	[M-H]-	-	Citric acid monohydrate	Organic acids and derivatives	1.87667e+07	14500000	1.06567e+07	13400000	14500000
pmb0064	374.1	198.2	2.05	373.1	[M+H]+	C04831	DIMBOA glucoside	Others	1.42333e+06	617000	1.25667e+06	479000	1.04667e+06
pmb0069	122	105	2.26	121	[M+H]+	C09815	Benzamide	Others	9	418336	732667	580667	566000
pmb1240	503.2	311.1	3.79	502.2	[M+H]+	-	Phellodensin F	Others	1.84333e+06	1.04833e+06	3470000	2.21667e+06	2.20333e+06
pmb2507	213.1	97	0.92	214.1	[M-H]-	C00672	2-Deoxyribose 1-phosphate	Others	22439.3	26236.3	142733	205333	269000
pmb3079	300.1	96.9	1.15	301.1	[M-H]-	C04256	N-Acetylglucosamine 1-phosphate	Others	114833	161000	94733.3	119667	99800
pmb3081	289.1	97	1.08	290.1	[M-H]-	-	Glucarate O-Phosphoric acid	Others	182667	101433	79633.3	277667	124667
pme0534	195.2	74.9	0.63	196.06	[M-H]-	C00257	Gluconic acid	Others	9.99667e+06	1.01867e+07	11800000	1.02567e+07	1.07667e+07
pme2253	177.1	59	0.79	178.05	[M-H]-	C01040	L-Gulonic-γ-lactone	Others	1.53333e+07	1.44667e+07	10700000	11080000	11700000
pme2828	140	99	0.63	139.03	[M+H]+	C00870	4-Nitrophenol	Others	139333	121667	115000	133667	136667
pme2830	140	79	0.75	141.02	[M-H]-	-	O-Phosphorylethanolamine	Others	259333	250333	315333	257000	251667
pme2831	130	71.9	0.86	129.1	[M+H]+	C07151	"1,1-Dimethylbiguanide"	Others	139000	93566.7	119333	118000	121333
pme3511	287.1	243	1.21	288.06	[M-H]-	-	Orotidine	Others	44466.7	19966.7	60900	5906	40566.7
pme3705	193.1	73	0.72	194.04	[M-H]-	C00191	D-glucoronic acid	Others	2.53667e+06	2.85333e+06	2.56667e+06	2.53333e+06	2.53667e+06
pmf0141	121	76.9	4.58	122.07	[M-H]-	C05853	2-Phenylethanol	Others	7780000	5.61333e+06	2.76333e+06	5380000	4990000
pmf0217	259	78.9	0.79	304.1	[M-2Na+H]-	-	D-Glucose-6-phosphate disodium salt	Others	26400000	2.32333e+07	19200000	2.70333e+07	1.69667e+07
pmf0243	271.1	98.9	12.27	270.11	[M+H]+	-	Benzyl β-D-Glucopyranoside	Others	9.22667e+06	9270000	1.01133e+07	8.63667e+06	9.64667e+06
pmf0314	289.3	157	4.92	290.26	[M-H]-	-	ABIENOL	Others	24400	21266.7	25133.3	19666.7	26033.3
pmf0341	455.1	215.2	5.41	454.14	[M+H]+	C10289	ε-Viniferin	Others	220000	406333	120000	183667	326667
pmf0349	223.1	161	3.97	224.14	[M-H]-	C04166	Vomifoliol	Others	121667	111333	124667	89233.3	121333
pmf0351	241.1	121	3.06	240.14	[M+H]+	-	Cucumegastigmane I	Others	227000	160967	130333	81633.3	136000
pmf0534	165.1	123	7.13	164.08	[M+H]+	C09904	Hinokitiol	Others	789333	490000	897333	747667	507000
pmf0536	111	69	2.58	112.05	[M-H]-	C01066	"Cyclohexane-1,3-dione"	Others	18033.3	19300	23033.3	18933.3	20166.7
pmf0571	217.1	105	5.29	216.06	[M+H]+	C02954	6-Aminopenicillanic acid	Others	1.72667e+06	2.82333e+06	2430000	6230000	4.24333e+06
pmf0606	177	133.1	7.19	178.05	[M-H]-	-	Pectin (Technical Grade)	Others	162000	123533	207000	231000	165333
pma0101	293.2	163.2	2.45	292.16	[M+H]+	-	N-Caffeoyl agmatine	Phenolamides	7.06667e+06	2911000	2.45333e+06	2.85333e+06	3990000
pma0170	498.3	177.2	3.82	497.26	[M+H]+	-	"N', N''-Diferuloylspermidine"	Phenolamides	759667	218670	771333	1.30333e+06	822333
pma1839	309	207	2.95	308	[M+H]+	-	N-sinapoyl cadaverine	Phenolamides	442667	347667	400667	472667	444333
pmb0323	251.1	163.2	1.97	250.1	[M+H]+	C03002	N-Caffeoyl putrescine	Phenolamides	2.68333e+07	2.10033e+07	1.64333e+07	5.52333e+06	1.96333e+07
pmb0325	321.1	177.2	2.87	320.1	[M+H]+	-	N-Feruloyl spermidine	Phenolamides	7.45333e+06	1862000	5.27333e+06	4.16333e+06	4.83333e+06
pmb0488	146.2	72.2	0.56	145.2	[M+H]+	C00315	Spermidine	Phenolamides	36333.3	30433.3	28400	35166.7	26933.3
pmb0489	397.1	147.3	1.73	396.1	[M+H]+	-	N-hexosyl-p-coumaroyl putrescine	Phenolamides	522333	1256000	3600000	160000	1.59333e+06
pmb0490	235.1	146.8	2.29	234.1	[M+H]+	C18326	N-p-Coumaroyl putrescine	Phenolamides	3.46667e+06	4360000	1.07333e+07	554667	4.61333e+06
pmb0492	584.2	325	2.42	583.2	[M+H]+	-	"N',N"",N""'-p-coumaroyl-cinnamoyl-caffeoyl spermidine"	Phenolamides	4010000	2533000	3.16333e+06	5.53333e+06	1.11333e+07
pmb0493	277.2	147.2	2.58	276.2	[M+H]+	-	N'-p-Coumaroyl agmatine	Phenolamides	1.97333e+06	1322000	2.99667e+06	482667	1820000
pmb0494	295	206.9	2.77	294	[M+H]+	-	N-Sinapoyl putrescine	Phenolamides	1.21133e+06	809000	500667	300000	774333
pmb0496	307.2	177.2	2.78	306.2	[M+H]+	C18325	N-Feruloyl agmatine	Phenolamides	36500000	6.55667e+06	1.27667e+07	1.03667e+07	17000000
pmb0501	131.1	114.1	0.75	130.1	[M+H]+	C00179	Agmatine	Phenolamides	30500	33100	29666.7	39966.7	40933.3
pmb0504	469.1	177.4	2.17	468.1	[M+H]+	-	N-(4'-O-glycosyl)-feruloyl agmatine	Phenolamides	1.38667e+06	101003	283000	560333	636333
pmb0505	235.1	147.2	2.38	234.1	[M+H]+	-	N'-p-Coumaroyl putrescine	Phenolamides	3.61667e+06	5.14667e+06	1.16333e+07	582667	5.76667e+06
pmb0508	277.1	147.5	2.43	276.1	[M+H]+	C04498	N-p-Coumaroyl agmatine	Phenolamides	103500	36006	185000	9	130667
pmb0771	314	177	4.91	313	[M+H]+	C02717	N-Feruloyl tyramine	Phenolamides	16572.7	87233.3	31969.7	9	61600
pmb0896	265.1	177.5	2.33	264.1	[M+H]+	-	N'-Feruloyl putrescine	Phenolamides	7260000	2746000	5.93333e+06	2.26333e+06	4.33667e+06
pmb0907	265.1	177.1	2.29	264.1	[M+H]+	C10497	N-Feruloyl putrescine	Phenolamides	3.28333e+07	1.54033e+07	10590000	4020000	1.67667e+07
pmd0017	203	83	0.62	202	[M+H]+	C00750	Spermine	Phenolamides	8260000	1.19333e+07	7990000	9180000	9.26667e+06
pme2292	89	72	0.64	88.1	[M+H]+	C00134	Putrescine	Phenolamides	51566.7	38836.3	19569.7	93400	59866.7
pma0104	369.1	207.1	3.82	368.12	[M+H]+	-	N-sinapoyl hydroxycoumarin	Phenylpropanoids	442333	37366.7	399000	336000	333000
pma6561	341	135	2.86	342	[M-H]-	-	Caffeic acid O-glucoside	Phenylpropanoids	9.04333e+06	3.07667e+06	2480000	8.83667e+06	5830000
pma6599	207.1	85	3.31	206.1	[M+H]+	-	6-Hydroxymethylherniarin	Phenylpropanoids	160000	54333.3	69566.7	171333	104133
pmb0423	195.1	145.3	3.22	194.1	[M+H]+	-	Hydroxy-methoxycinnamate	Phenylpropanoids	3060000	4.58667e+06	5.90667e+06	3.28333e+06	4.47667e+06
pmb1178	339.1	145.4	3.32	338.1	[M+H]+	-	O-Feruloyl 2-hydroxylcoumarin	Phenylpropanoids	427333	97336.3	61200	625000	312667
pmb1207	339.1	153	3.34	338.1	[M+H]+	-	O-Feruloyl 3-hydroxylcoumarin	Phenylpropanoids	132200	19572.7	27739.3	15939.3	88500
pmb2835	181.1	166	3.95	182.1	[M-H]-	-	Syringaldehyde	Phenylpropanoids	20100	35333.3	26800	18200	24500
pmb2933	311.1	149.1	2.16	312.1	[M-H]-	-	Caftaric acid	Phenylpropanoids	548667	469333	438000	391333	432333
pmb2940	385.1	205	3.26	386.1	[M-H]-	-	1-O-beta-D-Glucopyranosyl sinapate	Phenylpropanoids	1.53333e+06	515667	581667	1990000	1.14667e+06
pme0303	179	135	3.23	180.04	[M-H]-	C01197	Caffeate	Phenylpropanoids	2.25667e+06	1160000	1.02233e+06	890667	1.59667e+06
pme0305	193.1	134	4.07	194.06	[M-H]-	C01494	Ferulic acid	Phenylpropanoids	1.51333e+06	476000	482000	1103000	887000
pme0388	183.1	137	3.25	182.06	[M+H]+	C05582	Homovanillic acid	Phenylpropanoids	8.00667e+06	5.72667e+06	9370000	11700000	9.65333e+06
pme0408	197.1	123	3.41	198.05	[M-H]-	C10833	Syringic acid	Phenylpropanoids	22933.3	28133.3	24266.7	23366.7	23266.7
pme0419	167.1	107	3.71	166.06	[M+H]+	C01744	3-(4-Hydroxyphenyl)propionic acid	Phenylpropanoids	1970000	1930000	1730000	2340000	2.22667e+06
pme0422	193.1	134	4.08	194.06	[M-H]-	-	3-Hydroxy-4-methoxycinnamic acid	Phenylpropanoids	1.58667e+06	482667	502000	1.04167e+06	895333
pme1434	371.1	209	2.58	372.14	[M-H]-	C01533	Syringin	Phenylpropanoids	74666.7	9	77300	25469.7	47833.3
pme1436	163	119	3.86	164.05	[M-H]-	C00811	p-Coumaric acid	Phenylpropanoids	9.97333e+06	2340000	2.37667e+06	2790000	4.33667e+06
pme1637	179.1	146	3.88	180.08	[M-H]-	C00590	Coniferyl alcohol	Phenylpropanoids	93900	6839.33	61066.7	35000	57733.3
pme1638	369.1	193	11.9	370.11	[M-H]-	-	sesamolin	Phenylpropanoids	2.62667e+06	2.29667e+06	2.29667e+06	2470000	2.55333e+06
pme1695	223.1	193	4.06	224.07	[M-H]-	C00482	Sinapic acid	Phenylpropanoids	245667	160000	55633.3	245667	184000
pme2993	193.1	133	4.16	192.04	[M+H]+	C01752	Scopoletin (7-Hydroxy-5-methoxycoumarin)	Phenylpropanoids	549333	544333	337333	457333	466667
pme3123	209	179	3.88	210.09	[M-H]-	C02325	Sinapyl alcohol	Phenylpropanoids	60866.7	64466.7	61600	62633.3	46300
pme3140	175	131	4.11	176.05	[M-H]-	-	6-Hydroxy-4-methylcoumarin	Phenylpropanoids	1.34333e+06	1.11667e+06	1.71667e+06	1.25333e+06	1370000
pme3246	341	179	2.72	342.13	[M-H]-	C00761	Coniferin	Phenylpropanoids	1.15667e+06	1170000	450667	562333	864667
pme3305	149	131	3.67	150.07	[M-H]-	C02646	p-Coumaryl alcohol	Phenylpropanoids	616000	161000	8.20333e+06	179667	2460000
pme3419	179	123	3.24	178.03	[M+H]+	C09263	"Esculetin (6,7-dihydroxycoumarin)"	Phenylpropanoids	244333	117336	108336	204667	194333
pme3425	209.2	149.1	3.56	208.04	[M+H]+	C09265	"6-Methoxy-7,8-DihydroxyCoumarin"	Phenylpropanoids	1.04933e+06	934000	567333	2.03667e+06	978333
pme3428	339.1	177	2.72	340.08	[M-H]-	C09264	"Esculin (6,7-Dihydroxycoumarin-6-glucoside)"	Phenylpropanoids	2910000	2670000	3340000	2760000	2920000
pme3453	147.1	129	4.42	148.05	[M-H]-	-	p-Coumaraldehyde	Phenylpropanoids	38800	6846.67	88800	8986.67	28133.3
pme3553	187	131	5.94	186.03	[M+H]+	C09305	Psoralen	Phenylpropanoids	2.70333e+06	3110000	2310000	2.57333e+06	2450000
pmf0014	355.1	193	3.01	354.31	[M+H]+	C01527	Scopolin	Phenylpropanoids	1.99333e+06	467000	1340000	3.94667e+06	1.94667e+06
pmf0104	181	117	3.32	180.04	[M+H]+	C01481	Caffeic acid	Phenylpropanoids	1740000	603333	663333	1760000	1.27333e+06
pmf0271	165	146.8	3.86	164.05	[M+H]+	C00811	(E)-p-coumaric acid	Phenylpropanoids	432000	49436.3	88033.3	104600	172667
pmf0284	177.1	162	4.65	178.06	[M-H]-	C02666	4-Hydroxy-3-methoxycinnamaldehyde	Phenylpropanoids	30166.7	17900	24733.3	25333.3	22466.7
pmf0320	197.1	155	4.27	196.07	[M+H]+	C10664	Acetosyringone	Phenylpropanoids	157000	404333	92336.3	371333	283333
pmf0415	195.1	137	4.84	194.09	[M+H]+	C17497	Zingerone	Phenylpropanoids	332333	231000	415667	231333	313667
pmf0525	271	147	7.92	270.09	[M+H]+	C09269	Imperatorin	Phenylpropanoids	42000	220000	42366.7	48066.7	84133.3
pmf0527	245.1	159.2	8.3	244.11	[M+H]+	C09280	Osthole	Phenylpropanoids	219667	194933	265333	226333	234000
pmf0605	355.1	102.8	8.45	354.15	[M+H]+	C17499	Notopterol	Phenylpropanoids	96800	78800	92233.3	87166.7	77733.3
pmf0608	161	133.1	4.15	162.03	[M-H]-	C09315	Umbelliferone	Phenylpropanoids	42900	27633.3	4706	12700	57633.3
pmb2831	315.1	153.1	2.44	316.1	[M-H]-	-	Protocatechuic acid O-glucoside	Polyphenol	661667	212333	413000	440667	480333
pme0460	291	139	3.32	290.3	[M+H]+	C09727	L-Epicatechin	Polyphenol	763333	128700	189000	186333	278000
pme1486	457.2	169	3.33	458.09	[M-H]-	C09731	Epigallate catechin gallate (EGCG)	Polyphenol	17400000	443667	1.45867e+06	1.11267e+06	5.29667e+06
pme1516	307	139	2.76	306	[M+H]+	C12136	Epigallocatechin (EGC)	Polyphenol	1622000	9	66672.7	281673	446000
pme1535	305	125	2.28	306.07	[M-H]-	C12127	(+)-Gallocatechin (GC)	Polyphenol	545333	330667	238333	124700	282333
pme1564	443	123	3.88	442.3	[M+H]+	-	Epicatechin gallate (ECG)	Polyphenol	668667	11039.3	58006	35672.7	190667
pme1824	153.1	109	2.48	154.03	[M-H]-	C00230	Protocatechuic acid	Polyphenol	683333	421000	971667	431667	674333
pme2482	139.1	92.8	3.03	138.03	[M+H]+	C16700	Protocatechuic aldehyde	Polyphenol	38672.7	62269.7	124667	69703	195667
pmf0216	443.1	272.8	3.94	442.09	[M+H]+	-	Catechin gallate，CG	Polyphenol	344667	9	24606	32239.3	94600
pmf0380	459.1	139	3.45	458.08	[M+H]+	-	Gallocatechin gallate	Polyphenol	2.31667e+06	39969.7	215006	140006	696000
pmf0541	287.1	155	4.87	288.1	[M-H]-	C17412	Shikonin	Quinones	351333	273000	355000	332333	321333
pmf0070	415.4	119.2	7.75	414.39	[M+H]+	C01753	β-Sitosterol	Sterides	771000	973000	903000	2.91267e+06	1.32667e+06
pmf0073	399.4	235	12.28	400.37	[M-H]-	C01789	Campesterol	Sterides	22400	21500	22033.3	21100	20466.7
pmf0079	457.4	375.1	12.32	458.38	[M-H]-	C08980	Soyasapogenol B	Sterides	178000	179333	181000	179000	181000
pmf0085	427.4	345	12.26	426.39	[M+H]+	C01902	Cycloartenol	Sterides	394000	389333	425000	407000	407667
pmf0091	427.4	345	12.26	426.39	[M+H]+	-	"2,3-Oxidosqualene"	Sterides	388667	385667	419667	409333	404000
pmb2222	319.1	283.7	7.07	318.1	[M+H]+	-	Phytocassane C	Terpene	142500	125067	238333	71600	46566.7
pme0058	555.3	495.5	7.42	556.3	[M-H]-	C08797	Cucurbitacin E	Terpene	38800	39966.7	30433.3	51066.7	46033.3
pme0063	517.3	499	5.88	516.31	[M+H]+	C08796	Cucurbitacin D	Terpene	555000	1.03167e+06	409000	314667	583667
pme0065	515.3	479	6.42	514.29	[M+H]+	C08800	Cucurbitacin I	Terpene	202667	327333	193667	222667	283000
pme2184	515.2	161	7.08	514.22	[M+H]+	C08773	Nomilin	Terpene	79400	165133	81100	84600	153333
pmf0286	295.3	195.2	8.95	296.31	[M-H]-	C01389	Phytol	Terpene	927000	363000	889333	109700	592333
pmf0325	438	97	1.18	476.98	[M]-	C08405	Glucocheirolin	Terpene	112333	18436.3	48466.7	24533.3	47100
pmf0338	385.2	153	3.37	386.19	[M-H]-	-	Roseoside	Terpene	10400000	8.50333e+06	5.89667e+06	1.26667e+07	9340000
pmf0423	359.1	197	3.33	358.13	[M+H]+	C17071	Sweroside	Terpene	594000	193000	464667	1.43333e+06	651000
pmf0431	425.1	305.1	5.14	424.14	[M+H]+	C07602	Ginkgolide B	Terpene	140667	267667	62966.7	146333	214000
pmf0433	375.1	195.1	3.08	374.12	[M+H]+	C09800	Swertiamarin	Terpene	200000	249333	351333	250333	289667
pmf0449	375.1	169.1	2.61	376.14	[M-H]-	C01512	Loganic acid	Terpene	38566.7	83200	149667	9	72366.7
pmf0451	823.4	643.5	4.4	800.49	[M+Na]+	C08946	Ginsenoside Rg1	Terpene	388667	687000	347667	319333	613667
pmf0467	405	140.9	2.84	406.15	[M-H]-	C17000	Morroniside	Terpene	35866.7	55266.7	73200	14503	41066.7
pmf0487	955.4	793.5	5.5	956.5	[M-H]-	C17543	Ginsenoside Ro	Terpene	19333.3	9	8433	24433.3	14933.3
pmf0495	361.2	128	5.51	360.16	[M+H]+	C09204	Triptolide	Terpene	151333	161000	148667	176000	142667
pmf0509	153.2	71	12.43	152.12	[M+H]+	C00809	(-)-Camphor	Terpene	1.09667e+06	986333	1.01867e+06	1060000	1.04667e+06
pmf0613	155.1	114	12.35	154.14	[M+H]+	C16772	α-Terpineol	Terpene	44100000	4.27333e+07	4.58333e+07	43800000	4.41667e+07
pma1751	286	124	1.95	285	[M+H]+	-	Nicotinic acid-hexoside	Vitamins and derivatives	5.58667e+06	1.92033e+06	2.07667e+06	1.39667e+06	2650000
pma3101	256.2	124.1	0.84	255.2	[M+H]+	C05841	Nicotinate ribonucleoside	Vitamins and derivatives	2490000	1.05733e+06	2.17667e+06	1.19333e+06	1850000
pmb0789	332.1	314.3	1.16	331.1	[M+H]+	-	Pyridoxine O-glucoside	Vitamins and derivatives	699333	477667	394333	3150000	1.13333e+06
pmb0801	346	184.1	1.58	345	[M+H]+	-	4-Pyridoxic acid O-hexoside	Vitamins and derivatives	379333	683000	1170000	340333	732333
pmb0802	220.2	202.1	2.15	219.2	[M+H]+	C00864	D-Pantothenic acid	Vitamins and derivatives	1.44333e+08	100500000	1.23333e+08	1.35333e+08	136000000
pme0489	137	108	1.97	136	[M+H]+	-	N-Methylnicotinamide	Vitamins and derivatives	903667	125339	725000	218670	623667
pme0490	124	78	1.16	123	[M+H]+	C00253	Nicotinic acid	Vitamins and derivatives	4970000	1.77334e+06	4200000	3.77333e+06	5460000
pme0491	138	94	1.47	139	[M-H]-	C01020	6-hydroxynicotinic acid	Vitamins and derivatives	143000	97300	118333	177667	125667
pme1281	246	96.9	2.01	247.03	[M-H]-	C00018	Pyridoxal 5'-phosphate	Vitamins and derivatives	9	691667	594000	702667	650333
pme1383	170.1	134.1	1.16	169.07	[M+H]+	C00314	Pyridoxine	Vitamins and derivatives	1.75667e+06	1709000	790333	3.28667e+06	2.09333e+06
pme1709	138.1	78	3.73	137.05	[M+H]+	-	Nicotinic Acid Methyl Ester (Methyl Nicotinate)	Vitamins and derivatives	107700	73066.7	80333.3	124333	97033.3
pme1949	375	255	3.26	376.14	[M-H]-	C00255	Riboflavin	Vitamins and derivatives	1620000	1.92667e+06	1.17667e+06	2.41667e+06	1.79333e+06
pme2111	175	87	0.85	176.12	[M-H]-	C00072	L-ascorbate	Vitamins and derivatives	2.46667e+06	10270000	10800000	7.44667e+06	7.22333e+06
pme2165	155	111	1.15	156.02	[M-H]-	C00295	Orotic acid	Vitamins and derivatives	692000	148000	572667	72303	482667
pme2266	245.1	227	3.37	244.09	[M+H]+	C00120	Biotin	Vitamins and derivatives	1.14333e+06	580333	458667	1.12333e+06	716667
pme3478	277.1	146	2.84	278.13	[M-H]-	C00831	Pantetheine	Vitamins and derivatives	4.26333e+06	2.21667e+06	3920000	2.18333e+06	2.55667e+06

## Sheet: Table S2
Table S2. List of the 30 key differentially accumulated metabolites .
Index	Q1 (Da)	Q3 (Da)	Rt (min)	Molecular Weight (Da)	Ionization model	KEGG ID	Compounds	Class
pmf0179	623.2	315.1	4.04	624.17	[M-H]-	-	Narcissoside	Flavonoid
pme3484	479.1	315.5	3.53	480.09	[M-H]-	-	Myricetin 3-O-galactoside	Flavonol
pmf0431	425.1	305.1	5.14	424.14	[M+H]+	C07602	Ginkgolide B	Terpene
pme1383	170.1	134.1	1.16	169.07	[M+H]+	C00314	Pyridoxine	Vitamins and derivatives
pme0332	577.2	269	4.01	578.16	[M-H]-	C12627	Apigenin 7-O-neohesperidoside (Rhoifolin)	Flavone
pme0256	151	151	1.19	152.03	[M-H]-	C00385	Xanthine	Nucleotide and derivates
pme3305	149	131	3.67	150.07	[M-H]-	C02646	p-Coumaryl alcohol	Phenylpropanoids
pme1107	150	133	1.32	151.05	[M-H]-	C00242	Guanine	Nucleotide and derivates
pme3825	196.2	135	1.16	197.07	[M-H]-	C00355	"3,4-Dihydroxy-DL-phenylalanine"	Amino acid and derivatives
pme1408	145.1	109	0.76	146.07	[M-H]-	C00064	L-Glutamine	Amino acid and derivatives
pmb3101	175.1	115	2.75	176.1	[M-H]-	C02504	2-Isopropylmalate	Organic acids and derivatives
pma6281	145.1	101.1	0.75	146.06	[M-H]-	-	Methylglutaric acid	Organic acids and derivatives
pmb0490	235.1	146.8	2.29	234.1	[M+H]+	C18326	N-p-Coumaroyl putrescine	Phenolamides
pme0122	189.2	126	1.14	188.12	[M+H]+	C02727	N6-Acetyl-L-lysine	Amino acid and derivatives
pmd0023	266	134	1.81	267	[M-H]-	C00212	Adenosine	Nucleotide and derivates
pme0042	173.1	131.1	0.73	174.11	[M-H]-	C00062	L-(+)-Arginine	Amino acid and derivatives
pme0183	152.1	135	0.86	151.05	[M+H]+	-	2-Hydroxy-6-aminopurine	Nucleotide and derivates
pmb2855	307	145	0.77	308	[M-H]-	-	L-Glutamine O-hexside	Amino acid and derivatives
pmb2654	460.1	117.9	0.78	461.1	[M-H]-	-	Anthranilate O-hexosyl-O-hexoside	Organic acids and derivatives
pme1070	180.1	119.3	1.16	181.07	[M-H]-	C00082	L-(-)-Tyrosine	Amino acid and derivatives
pme3453	147.1	129	4.42	148.05	[M-H]-	-	p-Coumaraldehyde	Phenylpropanoids
pme1695	223.1	193	4.06	224.07	[M-H]-	C00482	Sinapic acid	Phenylpropanoids
pmf0482	515.1	191	3.13	516.13	[M-H]-	C10445	Cynarin	Organic acids and derivatives
pme0367	577.2	269	4.01	578.16	[M-H]-	-	Apigenin 7-rutinoside (Isorhoifolin)	Flavone
pma6647	625.2	607.1	3.37	624.2	[M+H]+	-	C-hexosyl-chrysoeriol O-hexoside	Flavone
pme0226	131.1	114	0.78	132.05	[M-H]-	C00152	L-Asparagine	Amino acid and derivatives
pme1712	275	257	0.79	276.13	[M-H]-	C00449	L-Saccharopine	Amino acid and derivatives
pme1539	623.2	314	3.66	624.17	[M-H]-	-	Isorhamnetin 3-O-neohesperidoside	Flavonol
pme0309	183	124	3.14	184.04	[M-H]-	-	Methyl gallate	Organic acids and derivatives
pmb0489	397.1	147.3	1.73	396.1	[M+H]+	-	N-hexosyl-p-coumaroyl putrescine	Phenolamides

## Sheet: Table S3
Table S3. Summary of the high-quality transcriptome data of the four different colored BMPs.
Sample	Raw reads (bp)	clean reads (bp)	cleans bases (bp)	Error Rate	Q20 (%)	Q30 (%)	GC content	Total mapping rate (%)	Unique mapping rate (%)
1392-r1	46918181	46312198	6946829700	0.405	96.475	90.945	45.615	85.64	81.55
1392-r2	42943937	42395638	6359345700	0.42	96.32	90.57	45.42	85.45	80.92
1392-r3	46478952	45855690	6878353500	0.44	96.06	90.125	45.55	84.57	79.85
262-r1	44428415	43876282	6581442300	0.455	95.9	89.78	45.605	82.61	77.75
262-r2	47604643	46981222	7047183300	0.395	96.65	91.285	45.665	83.59	79.5
262-r3	46537232	45933200	6889980000	0.435	96.2	90.36	45.625	83.41	79.18
K1102-r1	40959051	40444732	6066709800	0.475	95.665	89.38	45.73	85.03	80.27
K1102-r2	49182374	48540066	7281009900	0.465	95.83	89.675	45.53	85.34	80.67
K1102-r3	42924904	42378848	6356827200	0.43	96.22	90.37	45.685	85.34	80.69
K115-r1	45756779	45154596	6773189400	0.465	95.76	89.53	45.51	84.44	79.24
K115-r2	40633136	40108400	6016260000	0.46	95.895	89.76	45.51	85.72	81.2
K115-r3	43965714	43391150	6508672500	0.42	96.315	90.565	45.59	86.23	82.09

## Sheet: Table S4
Table S4. List of primers used for the qRT-PCR analysis.
Gene ID	Forward primer (5'->3')	Reverse primer (5'->3')
gene10086	AGAGCGAATGAAAGGAATAGGAG	CGTTAGAGCAGGAAGAGGAGAAA
gene9875	GCTTCTCGCAACTGAGGTCG	CCACAGGCCACTCCACAGAG
gene9690	AAACGGCTTTAGCAAGGGAT	AATTGGTAAGGCTCCTGAGGTAG
gene9747	CCATTGACATTCAGCGTAGGA	AGAGGAAGGTGCCGAGGAT
gene4311	TTTGCCTGCATCCAACTACCT	GCATACGCATAAGCCACCACA
gene16234	CCTTGTCCGCCTTCCTCTAC	TGGCTCCAGTCTTGACCGTAT
gene10751	TACCTGATCCAACGCCAAATT	ACCCAACACTTCTCCGAATACTT
gene10300	GGAGACTCGTCGGGATGGA	CGGGTTGGTGGAAATAGGG
gene10063	GCAGGTTCAACCGCAGACC	CCGATGCGACAAGCACTCC
gene10181	GGCTGCTCCCAGGTTGCTT	GGTCACCGAGACCGTGCTTT
PP2A	AAGAGAGCAACGTACAGCCT	CCGGTCCACATAATCTCCCA

## Sheet: Table S5
Table S5. Liquid chromatography (A) and mass spectrometry (B) conditions
A)						B)
Item	Detail						Item	Detail
Chromatographic column	Agilent SB-C18 (1.8 μm, 2.1 mm×100 mm)						Electrospray ionization (ESI) temperature	500°C
Mobile phase	A: ultra-pure water (0.1% formic acid); B: acetonitrile (0.1% formic acid)						Ion spray voltage (IS)	5500 V (positive ion mode) /- 4500 V (negative ion mode)
Elution gradient	0.00-9.00 min: mobile phase A: 95%; mobile phase B: 5%						Ion-source gas I (GSI)	50 psi
	9.00-10.00 min: mobile phase A: 5%; mobile phase B: 95%						gas II (GSII)	60 psi
	10.00-25.10 min: mobile phase A: 95%; mobile phase B: 5%						gas curtain gas (CUR)	25 psi
Flow rate	0.35 mL/min						collision-induced ionization parameters	High
Column temperature	40°C						Instrument tuning and quality calibration	In QQQ and LIT modes with 10 and 100 μmol/L polypropylene glycol solutions, respectively.
Sample size	2 μL						The QQQ scan	MRM mode
							The collision gas (nitrogen) Medium
							The DP and CE of the individual MRM ion pairs were completed by further declustering potential (DP) and collision energy (CE) optimization.
							A specific group of MRM ion pairs was monitored in each period based on the metabolite’s elution within each period.
							LC-ESI-MS/MS system	UPLC, Shim-pack UFLC SHIMADZU CBM A system
							MS	QTRAP® 4500+
							Triple quadrupole-linear ion trap (Q TRAP)	AB4500 Q TRAP UPLC/MS/MS System
							Data collection	Analyst 1.6.3 software (AB Sciex)
